# Supplementary material
Source: publisher figshare collection journal article supplement (https://tandf.figshare.com/ndownloader/files/40925604)
Supplement: Supplementary file 1 [file 40925604]

## Sheet: Sheet1
	Investigating the therapeutic potential of Trigonella foenum-graecum in bladder cancer treatment: A network pharmacology, molecular docking, and molecular dynamics study
	Said Bitam, Mabrouk Hamadache, Salah Hanini
	Supplementary files

## Sheet: S1
Sources	Name	Molecule	CaInactivenical SMILES	Formula	Hepatotoxicity	Carcinogenicity	Immunotoxicity	Mutagenicity	Cytotoxicity	MW	GI absorption	BBB permeant	Pgp substrate	Lipinski #violations	Ghose #violations	Veber #violations	Egan #violations	Muegge #violations	Bioavailability Score	PAINS #alerts	Brenk #alerts	Leadlikeness #violations
pubchem	Panasenoside	Molecule 1	OC[C@H]1O[C@@H](Oc2c(oc3c(c2=O)c(O)cc(c3)O)c2ccc(cc2)O)[C@@H]([C@H]([C@H]1O)O)O[C@@H]1O[C@H](CO)[C@H]([C@@H]([C@H]1O)O)O	C27H30O16						610.52	Low	No	Yes	3	4	1	1	4	0.17	0	0	1
pubchem	(1S,2S,4R,5'R,6R,7S,8R,9S,12S,13R,16S)-5',7,9,13-tetramethyl-16-spiro[5-oxapentacyclo[10.8.0.02,9.04,8.013,18]eicos-18-ene-6,2'-oxane]ol	Molecule 2	C[C@@H]1CC[C@@]2(OC1)O[C@H]1[C@H]([C@@H]2C)[C@@]2([C@@H](C1)[C@@H]1CC=C3[C@]([C@H]1CC2)(C)CC[C@@H](C3)O)C	C27H42O3						414.62	High	Yes	No	1	2	0	0	1	0.55	0	1	2
pubchem	Tigogenin	Molecule 3	C[C@@H]1CC[C@@]2(OC1)O[C@@H]1[C@H]([C@@H]2C)[C@@]2([C@@H](C1)[C@@H]1CC[C@@H]3[C@]([C@H]1CC2)(C)CC[C@@H](C3)O)C	C27H44O3						416.64	High	Yes	No	1	2	0	0	1	0.55	0	0	2
pubchem	Diosgenin	Molecule 4	C[C@@H]1CC[C@@]2(OC1)O[C@@H]1[C@H]([C@@H]2C)[C@@]2([C@@H](C1)[C@@H]1CC=C3[C@]([C@H]1CC2)(C)CC[C@@H](C3)O)C	C27H42O3						414.62	High	Yes	No	1	2	0	0	1	0.55	0	1	2
pubchem	(2S,3R,4S,5S,6R)-2-[[(2R,3S,4R,5R,6R)-4,5-dihydroxy-2-(hydroxymethyl)-6-[[(1R,2S,4S,5'R,6R,7S,8R,9S,12S,13S,16S,18S)-5',7,9,13-tetramethyl-16-spiro[5-oxapentacyclo[10.8.0.02,9.04,8.013,18]eicosane-6,2'-oxane]yl]oxy]-3-oxanyl]oxy]-6-(hydroxymethyl)oxane-3,4,5-triol	Molecule 5	OC[C@H]1O[C@@H](O[C@H]2CC[C@]3([C@H](C2)CC[C@@H]2[C@@H]3CC[C@]3([C@H]2C[C@H]2[C@@H]3[C@H](C)[C@]3(O2)CC[C@H](CO3)C)C)C)[C@@H]([C@H]([C@@H]1O[C@@H]1O[C@H](CO)[C@H]([C@@H]([C@H]1O)O)O)O)O	C39H64O13						740.92	Low	No	Yes	3	3	1	1	5	0.17	0	1	1
pubchem	(1R,4aS,8aS)-7-methyl-4-methylene-1-propan-2-yl-2,3,4a,5,6,8a-hexahydro-1H-naphthalene	Molecule 6	CC1=C[C@H]2[C@H](CC1)C(=C)CC[C@@H]2C(C)C	C15H24						204.35	Low	No	No	1	0	0	0	1	0.55	0	1	2
pubchem	(3S,8S,9S,10R,13R,14S,17R)-10,13-dimethyl-17-[(2R)-6-methyl-5-methyleneheptan-2-yl]-2,3,4,7,8,9,11,12,14,15,16,17-dodecahydro-1H-cyclopenta[a]phenanthren-3-ol	Molecule 7	O[C@H]1CC[C@]2(C(=CC[C@@H]3[C@@H]2CC[C@]2([C@H]3CC[C@@H]2[C@@H](CCC(=C)C(C)C)C)C)C1)C	C28H46O						398.66	Low	No	No	1	2	0	1	2	0.55	0	1	2
pubchem	Sarsasapogenin	Molecule 8	C[C@H]1CC[C@@]2(OC1)O[C@@H]1[C@H]([C@@H]2C)[C@@]2([C@@H](C1)[C@@H]1CC[C@H]3[C@]([C@H]1CC2)(C)CC[C@@H](C3)O)C	C27H44O3						416.64	High	Yes	No	1	2	0	0	1	0.55	0	0	2
pubchem	(1S,2S,4S,6R,7S,8R,9S,12S,13R,16S)-5',7,9,13,19-pentamethyl-16-spiro[5-oxapentacyclo[10.8.0.02,9.04,8.013,18]eicos-18-ene-6,2'-oxane]ol	Molecule 9	CC1CC[C@@]2(OC1)O[C@@H]1[C@H]([C@@H]2C)[C@@]2([C@@H](C1)[C@@H]1CC(=C3[C@]([C@H]1CC2)(C)CC[C@@H](C3)O)C)C	C28H44O3						428.65	High	No	No	1	2	0	1	1	0.55	0	1	2
pubchem	Smilagenin	Molecule 10	C[C@@H]1CC[C@@]2(OC1)O[C@@H]1[C@H]([C@@H]2C)[C@@]2([C@@H](C1)[C@@H]1CC[C@H]3[C@]([C@H]1CC2)(C)CC[C@@H](C3)O)C	C27H44O3						416.64	High	Yes	No	1	2	0	0	1	0.55	0	0	2
pubchem	3',5,7-trihydroxy-5'-methoxyisoflavone	Molecule 11	COc1cc(O)cc(c1)c1coc2c(c1=O)c(O)cc(c2)O	C16H12O6	Inactive	Inactive	Inactive	Inactive	Inactive	300.26	High	No	No	0	0	0	0	0	0.55	0	0	0
pubchem	(9R,10S,13R,14R,17R)-17-[(2R,5R)-5,6-dimethylheptan-2-yl]-10,13-dimethyl-2,3,4,5,6,9,11,12,14,15,16,17-dodecahydro-1H-cyclopenta[a]phenanthren-3-ol	Molecule 12	OC1CC[C@]2(C(C1)CC=C1[C@@H]2CC[C@]2([C@H]1CC[C@@H]2[C@@H](CC[C@H](C(C)C)C)C)C)C	C28H48O						400.68	Low	No	No	1	2	0	1	2	0.55	0	1	2
pubchem	(2,3,4,5,6-pentaphosphonooxycyclohexyl) dihydrogen phosphate	Molecule 13	OP(=O)(OC1C(OP(=O)(O)O)C(OP(=O)(O)O)C(C(C1OP(=O)(O)O)OP(=O)(O)O)OP(=O)(O)O)O	C6H18O24P6						660.04	Low	No	Yes	3	2	2	1	5	0.11	0	1	2
pubchem	17-(5-ethyl-6-methylheptan-2-yl)-10,13-dimethyl-2,3,4,7,8,9,11,12,14,15,16,17-dodecahydro-1H-cyclopenta[a]phenanthren-3-ol	Molecule 14	CCC(C(C)C)CCC(C1CCC2C1(C)CCC1C2CC=C2C1(C)CCC(C2)O)C	C29H50O						414.71	Low	No	No	1	3	0	1	2	0.55	0	1	2
pubchem	dodecane	Molecule 15	CCCCCCCCCCCC	C12H26						170.33	Low	No	No	1	0	0	0	3	0.55	0	0	3
pubchem	heptanal	Molecule 16	CCCCCCC=O	C7H14O						114.19	High	Yes	No	0	2	0	0	2	0.55	0	1	1
pubchem	1-hexanol	Molecule 17	CCCCCCO	C6H14O						102.17	High	Yes	No	0	2	0	0	2	0.55	0	0	1
pubchem	2-heptanone	Molecule 18	CCCCCC(=O)C	C7H14O						114.19	High	Yes	No	0	2	0	0	2	0.55	0	0	1
pubchem	2-hexylfuran	Molecule 19	CCCCCCc1ccco1	C10H16O						152.23	High	Yes	No	0	1	0	0	2	0.55	0	0	2
pubchem	3-(4-hydroxyphenyl)-2-propenoic acid [2-[5,7-dihydroxy-2-(4-hydroxyphenyl)-4-oxo-1-benzopyran-8-yl]-4,5-dihydroxy-6-(hydroxymethyl)-3-oxanyl] ester	Molecule 20	OCC1OC(C(C(C1O)O)OC(=O)C=Cc1ccc(cc1)O)c1c(O)cc(c2c1oc(cc2=O)c1ccc(cc1)O)O	C30H26O12						578.52	Low	No	No	3	2	1	1	3	0.17	0	1	1
pubchem	3-(4-hydroxy-3-methoxyphenyl)-2-propenoic acid	Molecule 21	COc1cc(C=CC(=O)O)ccc1O	C10H10O4						194.18	High	Yes	No	0	0	0	0	1	0.85	0	1	1
pubchem	4-Hydroxyisoleucine	Molecule 22	C[C@H]([C@@H]([C@@H](C(=O)[O-])[NH3+])C)O	C6H13NO3						147.17	Low	No	No	0	3	0	0	2	0.55	0	0	1
pubchem	Thymol	Molecule 23	Cc1ccc(c(c1)O)C(C)C	C10H14O						150.22	High	Yes	No	0	1	0	0	2	0.55	0	0	1
pubchem	(1S,2S,4R)-1-ethenyl-1-methyl-2,4-bis(1-methylethenyl)cyclohexane	Molecule 24	C=C[C@]1(C)CC[C@H](C[C@H]1C(=C)C)C(=C)C	C15H24						204.35	Low	No	No	1	0	0	0	2	0.55	0	1	2
pubchem	(E)-3-(3,4-dihydroxyphenyl)-2-propenoic acid	Molecule 25	OC(=O)/C=C/c1ccc(c(c1)O)O	C9H8O4						180.16	High	No	No	0	0	0	0	1	0.56	1	2	1
pubchem	(3S,5S,9R,10S,13R,14R,17R)-10,13-dimethyl-17-[(2R)-6-methylheptan-2-yl]-2,3,4,5,6,9,11,12,14,15,16,17-dodecahydro-1H-cyclopenta[a]phenanthren-3-ol	Molecule 26	CC(CCC[C@H]([C@H]1CC[C@@H]2[C@]1(C)CC[C@H]1C2=CC[C@@H]2[C@]1(C)CC[C@@H](C2)O)C)C	C27H46O						386.65	Low	No	No	1	2	0	1	2	0.55	0	1	2
pubchem	(2S,3R,4S,4aR,6aR,6bS,8aS,12aS,14aR,14bR)-2,3-dihydroxy-4,6a,6b,11,11,14b-hexamethyl-1,2,3,4a,5,6,7,8,9,10,12,12a,14,14a-tetradecahydropicene-4,8a-dicarboxylic acid	Molecule 27	O[C@H]1C[C@@]2(C)[C@H]([C@]([C@H]1O)(C)C(=O)O)CC[C@@]1([C@@H]2CC=C2[C@@]1(C)CC[C@@]1([C@H]2CC(C)(C)CC1)C(=O)O)C	C30H46O6						502.68	Low	No	Yes	1	3	0	0	1	0.56	0	1	2
pubchem	(E)-2-methyl-2-buten-1-ol	Molecule 28	C/C(=C\C)/CO	C5H10O						86.13	High	Yes	No	0	3	0	0	2	0.55	0	1	1
pubchem	(1S,4aR,8aR)-7-methyl-4-methylene-1-propan-2-yl-2,3,4a,5,6,8a-hexahydro-1H-naphthalene	Molecule 29	CC1=C[C@@H]2[C@@H](CC1)C(=C)CC[C@H]2C(C)C	C15H24						204.35	Low	No	No	1	0	0	0	1	0.55	0	1	2
pubchem	(1S,2S)-1-ethenyl-1-methyl-2-(1-methylethenyl)-4-propan-2-ylidenecyclohexane	Molecule 30	C=C[C@]1(C)CCC(=C(C)C)C[C@H]1C(=C)C	C15H24						204.35	Low	No	No	1	0	0	0	2	0.55	0	1	2
pubchem	(7aR)-4,4,7a-trimethyl-6,7-dihydro-5H-benzofuran-2-one	Molecule 31	O=C1C=C2[C@@](O1)(C)CCCC2(C)C	C11H16O2						180.24	High	Yes	No	0	0	0	0	1	0.55	0	0	1
pubchem	(1S,4S)-1,6-dimethyl-4-propan-2-yl-1,2,3,4-tetrahydronaphthalene	Molecule 32	CC([C@@H]1CC[C@@H](c2c1cc(C)cc2)C)C	C15H22						202.34	Low	No	No	1	0	0	0	2	0.55	0	0	2
pubchem	(E)-4-(2,6,6-trimethyl-1-cyclohexenyl)-3-buten-2-one	Molecule 33	CC(=O)/C=C/C1=C(C)CCCC1(C)C	C13H20O						192.3	High	Yes	No	0	0	0	0	2	0.55	0	1	1
pubchem	(E)-3-(3-hydroxyphenyl)-2-propenoic acid	Molecule 34	OC(=O)/C=C/c1cccc(c1)O	C9H8O3						164.16	High	Yes	No	0	0	0	0	1	0.85	0	1	1
pubchem	4-hydroxy-2,3-dimethyl-2H-furan-5-one	Molecule 35	CC1OC(=O)C(=C1C)O	C6H8O3						128.13	High	Yes	No	0	3	0	0	1	0.55	0	0	1
pubchem	1-pentanol	Molecule 36	CCCCCO	C5H12O						88.15	High	Yes	No	0	3	0	0	2	0.55	0	0	1
pubchem	hexanal	Molecule 37	CCCCCC=O	C6H12O						100.16	High	Yes	No	0	3	0	0	2	0.55	0	1	1
pubchem	aniline	Molecule 38	Nc1ccccc1	C6H7N						93.13	High	Yes	No	0	3	0	0	2	0.55	0	1	1
pubchem	Cholesterol	Molecule 39	CC(CCC[C@H]([C@H]1CC[C@@H]2[C@]1(C)CC[C@H]1[C@H]2CC=C2[C@]1(C)CC[C@@H](C2)O)C)C	C27H46O						386.65	Low	No	No	1	2	0	1	2	0.55	0	1	2
pubchem	(2R,3R,4S,5S,6R)-2-[[(2S,3S,4S,5R)-3,4-dihydroxy-2,5-bis(hydroxymethyl)-2-oxolanyl]oxy]-6-(hydroxymethyl)oxane-3,4,5-triol	Molecule 40	OC[C@H]1O[C@@]([C@H]([C@@H]1O)O)(CO)O[C@H]1O[C@H](CO)[C@H]([C@@H]([C@H]1O)O)O	C12H22O11						342.3	Low	No	Yes	2	1	1	1	4	0.17	0	0	0
pubchem	Trigonelline	Molecule 41	C[n+]1cccc(c1)C(=O)[O-]	C7H7NO2						137.14	High	No	No	0	4	0	0	1	0.55	0	1	1
pubchem	Ascorbic acid	Molecule 42	OC[C@@H]([C@H]1OC(=O)C(=C1O)O)O	C6H8O6						176.12	High	No	No	0	2	0	0	1	0.56	0	0	1
pubchem	5,7-dihydroxy-2-(4-hydroxyphenyl)-8-[3,4,5-trihydroxy-6-(hydroxymethyl)-2-oxanyl]-1-benzopyran-4-one	Molecule 43	OCC1OC(C(C(C1O)O)O)c1c(O)cc(c2c1oc(cc2=O)c1ccc(cc1)O)O	C21H20O10						432.38	Low	No	No	1	0	1	1	2	0.55	0	0	1
pubchem	7,4'-Dihydroxyflavone	Molecule 49	Oc1ccc(cc1)c1cc(=O)c2c(o1)cc(cc2)O	C15H10O4	Inactive	Inactive	Inactive	Inactive	Inactive	254.24	High	Yes	No	0	0	0	0	0	0.55	0	0	0
pubchem	1-ethenyl-1,2-dimethyl-2-(1-methylethenyl)-4-propan-2-ylidenecyclohexane	Molecule 45	C=CC1(C)CCC(=C(C)C)CC1(C)C(=C)C	C16H26						218.38	Low	No	No	1	0	0	0	2	0.55	0	1	2
pubchem	(9E,12E,15E)-octadeca-9,12,15-trienoic acid	Molecule 46	CC/C=C/C/C=C/C/C=C/CCCCCCCC(=O)O	C18H30O2						278.43	High	Yes	No	1	1	1	0	1	0.85	0	1	2
pubchem	2-(3,4-dihydroxyphenyl)-3,5-dihydroxy-7-[[(2S,3R,4S,5S,6R)-3,4,5-trihydroxy-6-(hydroxymethyl)-2-oxanyl]oxy]-1-benzopyran-4-one	Molecule 47	OC[C@H]1O[C@@H](Oc2cc(O)c3c(c2)oc(c(c3=O)O)c2ccc(c(c2)O)O)[C@@H]([C@H]([C@@H]1O)O)O	C21H20O12						464.38	Low	No	Yes	2	1	1	1	3	0.17	1	1	1
pubchem	5,7-dihydroxy-2-(4-hydroxyphenyl)-3-[[(2S,3R,4S,5S,6R)-3,4,5-trihydroxy-6-(hydroxymethyl)-2-oxanyl]oxy]-1-benzopyran-4-one	Molecule 48	OC[C@H]1O[C@@H](Oc2c(oc3c(c2=O)c(O)cc(c3)O)c2ccc(cc2)O)[C@@H]([C@H]([C@@H]1O)O)O	C21H20O11						448.38	Low	No	No	2	0	1	1	3	0.17	0	0	1
pubchem	Daidzein	Molecule 52	Oc1ccc(cc1)c1coc2c(c1=O)ccc(c2)O	C15H10O4	Inactive	Inactive	Inactive	Inactive	Inactive	254.24	High	Yes	No	0	0	0	0	0	0.55	0	0	0
pubchem	Kaempferol	Molecule 55	Oc1ccc(cc1)c1oc2cc(O)cc(c2c(=O)c1O)O	C15H10O6	Inactive	Inactive	Inactive	Inactive	Inactive	286.24	High	No	No	0	0	0	0	0	0.55	0	0	0
TCMSP	tricin	Molecule 227	COc1cc(cc(c1O)OC)c1cc(=O)c2c(o1)cc(cc2O)O	C17H14O7	Inactive	Inactive	Inactive	Inactive	Inactive	330.29	High	No	No	0	0	0	0	0	0.55	0	0	0
TCMSP	olmelin	Molecule 241	COc1ccc(cc1)c1coc2c(c1=O)c(O)cc(c2)O	C16H12O5	Inactive	Inactive	Inactive	Inactive	Inactive	284.26	High	No	No	0	0	0	0	0	0.55	0	0	0
pubchem	(3S,8S,9S,10R,13R,14S,17R)-10,13-dimethyl-17-[(E,2R)-5-propan-2-ylhept-5-en-2-yl]-2,3,4,7,8,9,11,12,14,15,16,17-dodecahydro-1H-cyclopenta[a]phenanthren-3-ol	Molecule 53	C/C=C(/C(C)C)\CC[C@H]([C@H]1CC[C@@H]2[C@]1(C)CC[C@H]1[C@H]2CC=C2[C@]1(C)CC[C@@H](C2)O)C	C29H48O						412.69	Low	No	No	1	3	0	1	2	0.55	0	1	2
pubchem	Linolenic acid	Molecule 54	CC/C=C\C/C=C\C/C=C\CCCCCCCC(=O)O	C18H30O2						278.43	Low	No	No	1	3	0	1	2	0.55	0	1	2
TCMSP	5,7,3'-Trihydroxy-5'-methylisoflavone	Molecule 247	Cc1cc(O)cc(c1)c1coc2c(c1=O)c(O)cc(c2)O	C16H12O5	Inactive	Inactive	Inactive	Inactive	Inactive	284.26	High	No	No	0	0	0	0	0	0.55	0	0	0
pubchem	2-(3,4-dihydroxyphenyl)-5,7-dihydroxy-3-[[(2S,3R,4S,5S,6R)-3,4,5-trihydroxy-6-[[(2R,3R,4R,5R,6S)-3,4,5-trihydroxy-6-methyl-2-oxanyl]oxymethyl]-2-oxanyl]oxy]-1-benzopyran-4-one	Molecule 56	Oc1cc(O)c2c(c1)oc(c(c2=O)O[C@@H]1O[C@H](CO[C@@H]2O[C@@H](C)[C@@H]([C@H]([C@H]2O)O)O)[C@H]([C@@H]([C@H]1O)O)O)c1ccc(c(c1)O)O	C27H30O16						610.52	Low	No	Yes	3	4	1	1	4	0.17	1	1	1
pubchem	(3S,8S,9S,10R,13R,14S,17R)-17-[(E,2R,5S)-5-ethyl-6-methylhept-3-en-2-yl]-10,13-dimethyl-2,3,4,7,8,9,11,12,14,15,16,17-dodecahydro-1H-cyclopenta[a]phenanthren-3-ol	Molecule 57	CC[C@@H](C(C)C)/C=C/[C@H]([C@H]1CC[C@@H]2[C@]1(C)CC[C@H]1[C@H]2CC=C2[C@]1(C)CC[C@@H](C2)O)C	C29H48O						412.69	Low	No	No	1	3	0	1	2	0.55	0	1	2
pubchem	Linoleic acid	Molecule 58	CCCCC/C=C\C/C=C\CCCCCCCC(=O)O	C18H32O2						280.45	Low	No	No	1	3	0	1	2	0.55	0	1	2
KNApSAck	Thiamine	Molecule 286	OCCc1sc[n+](c1C)Cc1cnc(nc1N)C	C12H17N4OS+	Inactive	Inactive	Inactive	Inactive	Inactive	265.35	High	No	Yes	0	0	0	0	0	0.55	0	1	0
pubchem	3',4',7-Trihydroxyflavone	Molecule 44	Oc1ccc2c(c1)oc(cc2=O)c1ccc(c(c1)O)O	C15H10O5	Inactive	Active	Inactive	Inactive	Inactive	270.24	High	No	No	0	0	0	0	0	0.55	1	1	0
pubchem	6,7,13,14-tetrahydroxy-2,9-dioxatetracyclo[6.6.2.04,16.011,15]hexadeca-1(15),4,6,8(16),11,13-hexaene-3,10-dione	Molecule 50	Oc1cc2c(=O)oc3c4c2c(c1O)oc(=O)c4cc(c3O)O	C14H6O8	Inactive	Active	Inactive	Inactive	Inactive	302.19	High	No	No	0	0	1	1	0	0.55	1	3	0
pubchem	4,7-dimethylene-1-propan-2-yl-1,2,3,4a,5,6,8,8a-octahydronaphthalene	Molecule 62	C=C1CCC2C(C1)C(CCC2=C)C(C)C	C15H24						204.35	Low	No	No	1	0	0	0	1	0.55	0	1	2
pubchem	2-(3,4-dihydroxyphenyl)-5,7-dihydroxy-3-[[(2S,3R,4R,5R,6S)-3,4,5-trihydroxy-6-(hydroxymethyl)-2-oxanyl]oxy]-1-benzopyran-4-one	Molecule 63	OC[C@@H]1O[C@@H](Oc2c(oc3c(c2=O)c(O)cc(c3)O)c2ccc(c(c2)O)O)[C@@H]([C@@H]([C@H]1O)O)O	C21H20O12						464.38	Low	No	No	2	1	1	1	3	0.17	1	1	1
pubchem	2-[[5-hydroxy-6-(hydroxymethyl)-2-[[6-hydroxy-7,9,13-trimethyl-6-[3-methyl-4-[[3,4,5-trihydroxy-6-(hydroxymethyl)-2-oxanyl]oxy]butyl]-5-oxapentacyclo[10.8.0.02,9.04,8.013,18]eicos-18-en-16-yl]oxy]-4-[[3,4,5-trihydroxy-6-(hydroxymethyl)-2-oxanyl]oxy]-3-oxanyl]oxy]-6-methyloxane-3,4,5-triol	Molecule 64	OCC1OC(OC2CCC3(C(=CCC4C3CCC3(C4CC4C3C(C)C(O4)(O)CCC(COC3OC(CO)C(C(C3O)O)O)C)C)C2)C)C(C(C1O)OC1OC(CO)C(C(C1O)O)O)OC1OC(C)C(C(C1O)O)O	C51H84O23						1065.2	Low	No	Yes	3	4	2	1	5	0.17	0	1	2
pubchem	7,4'-Dimethoxyflavone	Molecule 65	COc1ccc(cc1)c1cc(=O)c2c(o1)cc(cc2)OC	C17H14O4						282.29	High	Yes	No	0	0	0	0	0	0.55	0	0	1
pubchem	(E)-3-(4-hydroxy-3-methoxyphenyl)-2-propenoic acid	Molecule 66	COc1cc(/C=C/C(=O)O)ccc1O	C10H10O4						194.18	High	Yes	No	0	0	0	0	1	0.85	0	1	1
pubchem	Oleic acid	Molecule 67	CCCCCCCC/C=C\CCCCCCCC(=O)O	C18H34O2						282.46	High	No	No	1	1	1	1	1	0.85	0	1	2
pubchem	(3S,9S,10R,13R,14R,17R)-10,13-dimethyl-17-[(Z,2R)-5-propan-2-ylhept-5-en-2-yl]-2,3,4,9,11,12,14,15,16,17-decahydro-1H-cyclopenta[a]phenanthren-3-ol	Molecule 68	C/C=C(\C(C)C)/CC[C@H]([C@H]1CC[C@@H]2[C@]1(C)CC[C@H]1C2=CC=C2[C@]1(C)CC[C@@H](C2)O)C	C29H46O						410.67	Low	No	No	1	3	0	1	2	0.55	0	1	2
pubchem	(3R,4aS,8aR)-8a-methyl-5-methylene-3-(1-methylethenyl)-1,2,3,4,4a,6,7,8-octahydronaphthalene	Molecule 69	C=C1CCC[C@]2([C@H]1C[C@@H](CC2)C(=C)C)C	C15H24						204.35	Low	No	No	1	0	0	0	2	0.55	0	1	2
pubchem	Gitogenin	Molecule 70	C[C@@H]1CC[C@@]2(OC1)O[C@@H]1[C@H]([C@@H]2C)[C@@]2([C@@H](C1)[C@@H]1CC[C@@H]3[C@]([C@H]1CC2)(C)C[C@H]([C@@H](C3)O)O)C	C27H44O4						432.64	High	Yes	Yes	1	1	0	0	1	0.55	0	0	2
pubchem	(1S,3R,6S,8S,11S,12S,15R,16R)-12,16-dimethyl-15-[(2R)-6-methylheptan-2-yl]-6-pentacyclo[9.7.0.01,3.03,8.012,16]octadecanol	Molecule 71	CC(CCC[C@H]([C@H]1CC[C@@]2([C@]1(C)CC[C@@]13[C@H]2CC[C@@H]2[C@]3(C1)CC[C@@H](C2)O)C)C)C	C28H48O						400.68	Low	No	No	1	2	0	1	2	0.55	0	0	2
pubchem	(5S)-5-pentyl-2-oxolanone	Molecule 72	CCCCC[C@H]1CCC(=O)O1	C9H16O2						156.22	High	Yes	No	0	1	0	0	1	0.55	0	0	1
pubchem	(2S,3R,4S,5R,6R)-2-[[(2R,3R,4S,5R,6S)-6-[[(2R,3S,4S,5R,6R)-6-[[(2S,3S,4S,5R)-3,4-dihydroxy-2,5-bis(hydroxymethyl)-2-oxolanyl]oxy]-3,4,5-trihydroxy-2-oxanyl]methoxy]-3,4,5-trihydroxy-2-oxanyl]methoxy]-6-(hydroxymethyl)oxane-3,4,5-triol	Molecule 73	OC[C@H]1O[C@@]([C@H]([C@@H]1O)O)(CO)O[C@H]1O[C@H](CO[C@H]2O[C@H](CO[C@H]3O[C@H](CO)[C@@H]([C@@H]([C@H]3O)O)O)[C@@H]([C@@H]([C@H]2O)O)O)[C@H]([C@@H]([C@H]1O)O)O	C24H42O21						666.58	Low	No	Yes	3	4	2	1	5	0.17	0	0	2
pubchem	(2S,3R,4S,5R,6R)-2-[[(2R,3S,4S,5R,6R)-6-[[(2S,3S,4S,5R)-3,4-dihydroxy-2,5-bis(hydroxymethyl)-2-oxolanyl]oxy]-3,4,5-trihydroxy-2-oxanyl]methoxy]-6-(hydroxymethyl)oxane-3,4,5-triol	Molecule 74	OC[C@H]1O[C@@]([C@H]([C@@H]1O)O)(CO)O[C@H]1O[C@H](CO[C@H]2O[C@H](CO)[C@@H]([C@@H]([C@H]2O)O)O)[C@H]([C@@H]([C@H]1O)O)O	C18H32O16						504.44	Low	No	Yes	3	2	1	1	4	0.17	0	0	2
pubchem	(4S)-4-[[[(2S)-1-[(2S)-2-[[(2S)-2-[(2-amino-1-oxoethyl)amino]-3-(4-hydroxyphenyl)-1-oxopropyl]amino]-3-carboxy-1-oxopropyl]-2-pyrrolidinyl]-oxomethyl]amino]-5-[[(2S,3R)-1-[[2-[[(2S,3R)-1-[[(2S)-1-(carboxymethylamino)-3-(1H-indol-3-yl)-1-oxopropan-2-yl]amino]-3-hydroxy-1-oxobutan-2-yl]amino]-2-oxoethyl]amino]-3-hydroxy-1-oxobutan-2-yl]amino]-5-oxopentanoic acid	Molecule 75	NCC(=O)N[C@H](C(=O)N[C@H](C(=O)N1CCC[C@H]1C(=O)N[C@H](C(=O)N[C@H](C(=O)NCC(=O)N[C@H](C(=O)N[C@H](C(=O)NCC(=O)O)Cc1c[nH]c2c1cccc2)[C@H](O)C)[C@H](O)C)CCC(=O)O)CC(=O)O)Cc1ccc(cc1)O	C48H63N11O18						1082.08	Low	No	Yes	3	4	2	1	6	0.11	0	0	2
pubchem	dodecanoic acid	Molecule 76	CCCCCCCCCCCC(=O)O	C12H24O2						200.32	High	Yes	No	0	0	0	0	0	0.85	0	0	3
pubchem	Gallic acid	Molecule 77	OC(=O)c1cc(O)c(c(c1)O)O	C7H6O5						170.12	High	No	No	0	2	0	0	1	0.56	1	1	1
pubchem	2-methoxy-4-prop-2-enylphenol	Molecule 78	C=CCc1ccc(c(c1)OC)O	C10H12O2						164.2	High	Yes	No	0	0	0	0	1	0.55	0	1	1
pubchem	Yuccagenin	Molecule 79	C[C@@H]1CC[C@@]2(OC1)O[C@@H]1[C@H]([C@@H]2C)[C@@]2([C@@H](C1)[C@@H]1CC=C3[C@]([C@H]1CC2)(C)C[C@H]([C@@H](C3)O)O)C	C27H42O4						430.62	High	Yes	Yes	0	1	0	0	0	0.55	0	1	2
pubchem	(2S,3R,4S,5S,6R)-2-[[(2R,3R,4S,5R,6R)-3,5-dihydroxy-2-(hydroxymethyl)-6-[[(4S,5'S,7S,8R,9S,13S)-5',7,9,13-tetramethyl-16-spiro[5-oxapentacyclo[10.8.0.02,9.04,8.013,18]eicosane-6,2'-oxane]yl]oxy]-4-oxanyl]oxy]-6-(hydroxymethyl)oxane-3,4,5-triol	Molecule 80	OC[C@H]1O[C@@H](OC2CC[C@]3(C(C2)CCC2C3CC[C@]3(C2C[C@H]2[C@@H]3[C@H](C)C3(O2)CC[C@@H](CO3)C)C)C)[C@@H]([C@H]([C@@H]1O)O[C@@H]1O[C@H](CO)[C@H]([C@@H]([C@H]1O)O)O)O	C39H64O13						740.92	Low	No	Yes	3	3	1	1	5	0.17	0	1	1
pubchem	5',7,9,13-tetramethylspiro[5-oxapentacyclo[10.8.0.02,9.04,8.013,18]eicosane-6,2'-oxane]-15,16-diol	Molecule 81	CC1CCC2(OC1)OC1C(C2C)C2(C(C1)C1CCC3C(C1CC2)(C)CC(C(C3)O)O)C	C27H44O4						432.64	High	Yes	Yes	1	1	0	0	1	0.55	0	0	2
pubchem	2-(3,4-dihydroxyphenyl)-5,7-dihydroxy-3-[[(2S,3S,4R,5R,6S)-3,4,5-trihydroxy-6-methyl-2-oxanyl]oxy]-1-benzopyran-4-one	Molecule 82	Oc1cc(O)c2c(c1)oc(c(c2=O)O[C@@H]1O[C@@H](C)[C@@H]([C@H]([C@@H]1O)O)O)c1ccc(c(c1)O)O	C21H20O11						448.38	Low	No	Yes	2	0	1	1	3	0.17	1	1	1
pubchem	2-Amino-2,3,5-trideoxy-3-methyl-L-arabinonic acid	Molecule 83	C[C@@H]([C@@H]([C@H](C(=O)[O-])[NH3+])C)O	C6H13NO3						147.17	Low	No	No	0	3	0	0	2	0.55	0	0	1
pubchem	(2R,3S,4R)-2-ammonio-4-hydroxy-3-methylpentanoate	Molecule 84	C[C@H]([C@H]([C@H](C(=O)[O-])[NH3+])C)O	C6H13NO3						147.17	Low	No	No	0	3	0	0	2	0.55	0	0	1
pubchem	1,7,7-trimethyl-2-bicyclo[2.2.1]heptanone	Molecule 85	O=C1CC2C(C1(C)CC2)(C)C	C10H16O						152.23	High	Yes	No	0	1	0	0	2	0.55	0	0	1
pubchem	Trigoxazonane	Molecule 86	CCCCN1COCCOCCO1	C9H19NO3						189.25	High	Yes	No	0	0	0	0	1	0.55	0	0	1
pubchem	5',7,9,13-tetramethyl-16-spiro[5-oxapentacyclo[10.8.0.02,9.04,8.013,18]eicos-18-ene-6,2'-oxane]ol	Molecule 87	CC1CCC2(OC1)OC1C(C2C)C2(C(C1)C1CC=C3C(C1CC2)(C)CCC(C3)O)C	C27H42O3						414.62	High	Yes	No	1	2	0	0	1	0.55	0	1	2
pubchem	beta-Sitosterol	Molecule 88	CC[C@@H](C(C)C)CC[C@H]([C@H]1CC[C@@H]2[C@]1(C)CC[C@H]1[C@H]2CC=C2[C@]1(C)CC[C@@H](C2)O)C	C29H50O						414.71	Low	No	No	1	3	0	1	2	0.55	0	1	2
pubchem	Irilone	Molecule 51	Oc1ccc(cc1)c1coc2c(c1=O)c(O)c1c(c2)OCO1	C16H10O6	Inactive	Active	Active	Inactive	Inactive	298.25	High	No	No	0	0	0	0	0	0.55	0	0	0
pubchem	2-methyl-2-buten-1-ol	Molecule 90	CC(=CC)CO	C5H10O						86.13	High	Yes	No	0	3	0	0	2	0.55	0	1	1
pubchem	hydron;phenoxide	Molecule 91	[O-]c1ccccc1.[H+]	C6H5O						94.11	High	Yes	No	0	3	0	0	2	0.85	0	0	1
pubchem	hydron;oxalate	Molecule 92	[O-]C(=O)C(=O)[O-].[H+].[H+]	C2O4						90.03	Low	No	No	0	4	0	0	2	0.56	0	1	1
pubchem	(1S,3R,4R,5R)-3-[(E)-3-(3,4-dihydroxyphenyl)-1-oxoprop-2-enoxy]-1,4,5-trihydroxy-1-cyclohexanecarboxylic acid	Molecule 93	O=C(O[C@@H]1C[C@@](O)(C[C@H]([C@H]1O)O)C(=O)O)/C=C/c1ccc(c(c1)O)O	C16H18O9						354.31	Low	No	No	1	1	1	1	2	0.11	1	2	1
pubchem	3-[[(2R,3S,4R,5R,6S)-4,5-dihydroxy-6-(hydroxymethyl)-3-[[(2R,3S,4R,5R,6S)-3,4,5-trihydroxy-6-(hydroxymethyl)-2-oxanyl]oxy]-2-oxanyl]oxy]-5-hydroxy-2-(4-hydroxyphenyl)-7-[[(2R,3S,4R,5R,6S)-3,4,5-trihydroxy-6-(hydroxymethyl)-2-oxanyl]oxy]-1-benzopyran-4-one	Molecule 94	OC[C@@H]1O[C@H](Oc2c(oc3c(c2=O)c(O)cc(c3)O[C@H]2O[C@@H](CO)[C@@H]([C@H]([C@@H]2O)O)O)c2ccc(cc2)O)[C@H]([C@@H]([C@H]1O)O)O[C@H]1O[C@@H](CO)[C@@H]([C@H]([C@@H]1O)O)O	C33H40O21						772.66	Low	No	Yes	3	4	1	1	5	0.17	0	0	2
pubchem	(E)-3-(4-hydroxyphenyl)-2-propenoic acid [(2R,3R,4S,5S,6R)-2-[5,7-dihydroxy-2-(4-hydroxyphenyl)-4-oxo-1-benzopyran-8-yl]-4,5-dihydroxy-6-(hydroxymethyl)-3-oxanyl] ester	Molecule 95	OC[C@H]1O[C@@H]([C@@H]([C@H]([C@@H]1O)O)OC(=O)/C=C/c1ccc(cc1)O)c1c(O)cc(c2c1oc(cc2=O)c1ccc(cc1)O)O	C30H26O12						578.52	Low	No	No	3	2	1	1	3	0.17	0	1	1
pubchem	Vitexin 7-O-glucoside	Molecule 96	OC[C@H]1O[C@H]([C@@H]([C@H]([C@@H]1O)O)O)c1c(O[C@@H]2O[C@@H](CO)[C@H]([C@@H]([C@@H]2O)O)O)cc(c2c1oc(cc2=O)c1ccc(cc1)O)O	C27H30O15						594.52	Low	No	Yes	3	4	1	1	3	0.17	0	0	1
pubchem	(1R,2S,4R,5'S,6S,7R,8S,9R,12S,13R)-5',7,9,13-tetramethylspiro[5-oxapentacyclo[10.8.0.02,9.04,8.013,18]eicosa-16,18-diene-6,2'-oxane]	Molecule 97	C[C@H]1CC[C@]2(OC1)O[C@H]1[C@@H]([C@H]2C)[C@]2([C@@H](C1)[C@H]1CC=C3[C@]([C@H]1CC2)(C)CCC=C3)C	C27H40O2						396.61	Low	No	No	1	1	0	1	1	0.55	0	0	2
pubchem	Neocorymboside	Molecule 98	OC[C@H]1O[C@H]([C@@H]([C@H]([C@H]1O)O)O)c1c(O)c([C@@H]2OC[C@@H]([C@@H]([C@@H]2O)O)O)c(c2c1oc(cc2=O)c1ccc(cc1)O)O	C26H28O14						564.49	Low	No	Yes	3	3	1	1	4	0.17	0	0	1
pubchem	5-hydroxy-3-(4-hydroxy-3,5-dimethoxyphenyl)-7-[[(2S,3R,4S,5S,6R)-3,4,5-trihydroxy-6-(hydroxymethyl)-2-oxanyl]oxy]-1-benzopyran-4-one	Molecule 99	OC[C@H]1O[C@@H](Oc2cc(O)c3c(c2)occ(c3=O)c2cc(OC)c(c(c2)OC)O)[C@@H]([C@H]([C@@H]1O)O)O	C23H24O12						492.43	Low	No	Yes	2	1	1	1	3	0.17	0	0	1
pubchem	(1S,2S,4S,5'S,6R,7S,8R,9S,12R,13R,16S)-5',7,9,13-tetramethyl-16-spiro[5-oxapentacyclo[10.8.0.02,9.04,8.013,18]eicos-18-ene-6,2'-oxane]ol	Molecule 100	C[C@H]1CC[C@@]2(OC1)O[C@@H]1[C@H]([C@@H]2C)[C@@]2([C@@H](C1)[C@@H]1CC=C3[C@]([C@@H]1CC2)(C)CC[C@@H](C3)O)C	C27H42O3						414.62	High	Yes	No	1	2	0	0	1	0.55	0	1	2
pubchem	acetic acid [(2R,3R,4R,5R,6S)-3,4-dihydroxy-6-[[5-hydroxy-2-(4-hydroxyphenyl)-4-oxo-7-[[(2S,3S,4S,5S,6R)-3,4,5-trihydroxy-6-(hydroxymethyl)-2-oxanyl]oxy]-1-benzopyran-3-yl]oxy]-5-[[(2R,3R,4R,5R,6S)-3,4,5-trihydroxy-6-(hydroxymethyl)-2-oxanyl]oxy]-2-oxanyl]methyl ester	Molecule 101	OC[C@@H]1O[C@H](O[C@H]2[C@@H](O[C@@H]([C@@H]([C@H]2O)O)COC(=O)C)Oc2c(oc3c(c2=O)c(O)cc(c3)O[C@@H]2O[C@H](CO)[C@H]([C@@H]([C@@H]2O)O)O)c2ccc(cc2)O)[C@@H]([C@@H]([C@H]1O)O)O	C35H42O22						814.69	Low	No	Yes	3	4	2	1	5	0.17	0	0	2
pubchem	acetic acid [(2S,3R,4S,5R,6S)-3,4-dihydroxy-6-[[5-hydroxy-2-(4-hydroxyphenyl)-4-oxo-7-[[(2S,3S,4S,5S,6R)-3,4,5-trihydroxy-6-(hydroxymethyl)-2-oxanyl]oxy]-1-benzopyran-3-yl]oxy]-5-[[(2S,3S,4S,5S,6S)-3,4,5-trihydroxy-6-(hydroxymethyl)-2-oxanyl]oxy]-2-oxanyl]methyl ester	Molecule 102	OC[C@@H]1O[C@@H](O[C@H]2[C@@H](O[C@H]([C@@H]([C@@H]2O)O)COC(=O)C)Oc2c(oc3c(c2=O)c(O)cc(c3)O[C@@H]2O[C@H](CO)[C@H]([C@@H]([C@@H]2O)O)O)c2ccc(cc2)O)[C@H]([C@H]([C@@H]1O)O)O	C35H42O22						814.69	Low	No	Yes	3	4	2	1	5	0.17	0	0	2
pubchem	1-methyl-1,2-dihydropyridin-1-ium-3-carboxylate	Molecule 103	C[NH+]1C=CC=C(C1)C(=O)[O-]	C7H9NO2						139.15	Low	No	No	0	3	0	0	1	0.55	0	0	1
pubchem	3-[[(2S,3R,4S,5R,6S)-4,5-dihydroxy-6-(hydroxymethyl)-3-[[(2S,3R,4S,5S,6R)-3,4,5-trihydroxy-6-(hydroxymethyl)-2-oxanyl]oxy]-2-oxanyl]oxy]-2-(3,4-dihydroxyphenyl)-5-hydroxy-7-[[(2S,3R,4S,5S,6S)-3,4,5-trihydroxy-6-(hydroxymethyl)-2-oxanyl]oxy]-1-benzopyran-4-one	Molecule 104	OC[C@@H]1O[C@@H](Oc2c(oc3c(c2=O)c(O)cc(c3)O[C@@H]2O[C@@H](CO)[C@H]([C@@H]([C@H]2O)O)O)c2ccc(c(c2)O)O)[C@@H]([C@H]([C@H]1O)O)O[C@@H]1O[C@H](CO)[C@H]([C@@H]([C@H]1O)O)O	C33H40O22						788.66	Low	No	Yes	3	4	1	1	5	0.17	1	1	2
pubchem	Calycosin	Molecule 59	COc1ccc(cc1O)c1coc2c(c1=O)ccc(c2)O	C16H12O5	Inactive	Inactive	Active	Inactive	Inactive	284.26	High	No	No	0	0	0	0	0	0.55	0	0	0
pubchem	2-[[4,5-dihydroxy-6-methyl-2-[[3,4,5-trihydroxy-6-[(5',7,9,13-tetramethyl-16-spiro[5-oxapentacyclo[10.8.0.02,9.04,8.013,18]eicos-18-ene-6,2'-oxane]yl)oxy]-2-oxanyl]methoxy]-3-oxanyl]oxy]-6-(hydroxymethyl)oxane-3,4,5-triol	Molecule 106	OCC1OC(OC2C(OCC3OC(OC4CCC5(C(=CCC6C5CCC5(C6CC6C5C(C)C5(O6)CCC(CO5)C)C)C4)C)C(C(C3O)O)O)OC(C(C2O)O)C)C(C(C1O)O)O	C45H72O17						885.04	Low	No	Yes	3	3	1	1	5	0.17	0	1	2
pubchem	2-[[6-[[4,5-dihydroxy-6-methyl-2-[[3,4,5-trihydroxy-6-[(5',7,9,13-tetramethyl-16-spiro[5-oxapentacyclo[10.8.0.02,9.04,8.013,18]eicos-18-ene-6,2'-oxane]yl)oxy]-2-oxanyl]methoxy]-3-oxanyl]oxy]-4,5-dihydroxy-2-(hydroxymethyl)-3-oxanyl]oxy]-6-(hydroxymethyl)oxane-3,4,5-triol	Molecule 107	OCC1OC(OC2C(OCC3OC(OC4CCC5(C(=CCC6C5CCC5(C6CC6C5C(C)C5(O6)CCC(CO5)C)C)C4)C)C(C(C3O)O)O)OC(C(C2O)O)C)C(C(C1OC1OC(CO)C(C(C1O)O)O)O)O	C51H82O22						1047.18	Low	No	Yes	3	4	2	1	5	0.17	0	1	2
pubchem	(1aR,7R,7aR,7bS)-1,1,7,7a-tetramethyl-2,3,5,6,7,7b-hexahydro-1aH-cyclopropa[a]naphthalene	Molecule 108	C[C@@H]1CCC=C2[C@@]1(C)[C@H]1[C@H](C1(C)C)CC2	C15H24						204.35	Low	No	No	1	0	0	0	1	0.55	0	1	2
pubchem	3-octen-2-one	Molecule 109	CCCCC=CC(=O)C	C8H14O						126.2	High	Yes	No	0	1	0	0	2	0.55	0	1	1
pubchem	1-octen-2-ol	Molecule 110	CCCCCCC(=C)O	C8H16O						128.21	High	Yes	No	0	1	0	0	2	0.55	0	1	1
pubchem	1-tetradecene	Molecule 111	CCCCCCCCCCCCC=C	C14H28						196.37	Low	No	No	1	0	1	0	3	0.55	0	1	3
pubchem	undecane	Molecule 112	CCCCCCCCCCC	C11H24						156.31	Low	No	No	1	1	0	0	3	0.55	0	0	3
pubchem	5-hydroxy-2-(4-hydroxy-3,5-dimethoxyphenyl)-7-[[3,4,5-trihydroxy-6-(hydroxymethyl)-2-oxanyl]oxy]-1-benzopyran-4-one	Molecule 113	OCC1OC(Oc2cc(O)c3c(c2)oc(cc3=O)c2cc(OC)c(c(c2)OC)O)C(C(C1O)O)O	C23H24O12						492.43	Low	No	Yes	2	1	1	1	3	0.17	0	0	1
pubchem	5-hydroxy-2-(4-hydroxyphenyl)-3,7-bis[[3,4,5-trihydroxy-6-(hydroxymethyl)-2-oxanyl]oxy]-1-benzopyran-4-one	Molecule 114	OCC1OC(Oc2cc(O)c3c(c2)oc(c(c3=O)OC2OC(CO)C(C(C2O)O)O)c2ccc(cc2)O)C(C(C1O)O)O	C27H30O16						610.52	Low	No	Yes	3	4	1	1	4	0.17	0	0	1
pubchem	decanoate;hydron	Molecule 115	CCCCCCCCCC(=O)[O-].[H+]	C10H19O2						172.26	High	Yes	No	0	0	0	0	1	0.85	0	0	3
pubchem	(3S,8S,9S,10R,13S,14S,17R)-10,13-dimethyl-17-[(Z,2R)-5-propan-2-ylhept-5-en-2-yl]-2,3,4,7,8,9,11,12,14,15,16,17-dodecahydro-1H-cyclopenta[a]phenanthren-3-ol	Molecule 116	C/C=C(\C(C)C)/CC[C@H]([C@H]1CC[C@@H]2[C@@]1(C)CC[C@H]1[C@H]2CC=C2[C@]1(C)CC[C@@H](C2)O)C	C29H48O						412.69	Low	No	No	1	3	0	1	2	0.55	0	1	2
pubchem	Trigofoenoside B	Molecule 117	OCC1OC(OC2CC3CCC4C(C3(CC2O)C)CCC2(C4CC3C2C(C(O3)(O)CCC(COC2OC(CO)C(C(C2O)O)O)C)C)C)C(C(C1OC1OC(C)C(C(C1O)O)O)O)O	C45H76O19						921.07	Low	No	Yes	3	4	2	1	5	0.17	0	1	2
pubchem	2-[[4-hydroxy-6-(hydroxymethyl)-2-[[3,4,5-trihydroxy-6-[[6-hydroxy-7,9,13-trimethyl-6-[3-methyl-4-[[3,4,5-trihydroxy-6-(hydroxymethyl)-2-oxanyl]oxy]butyl]-5-oxapentacyclo[10.8.0.02,9.04,8.013,18]eicos-18-en-16-yl]oxy]-2-oxanyl]methoxy]-5-[(3,4,5-trihydroxy-2-oxanyl)oxy]-3-oxanyl]oxy]-6-methyloxane-3,4,5-triol	Molecule 118	OCC1OC(OCC2OC(OC3CCC4(C(=CCC5C4CCC4(C5CC5C4C(C)C(O5)(O)CCC(COC4OC(CO)C(C(C4O)O)O)C)C)C3)C)C(C(C2O)O)O)C(C(C1OC1OCC(C(C1O)O)O)O)OC1OC(C)C(C(C1O)O)O	C56H92O27						1197.31	Low	No	Yes	3	4	2	1	7	0.17	0	1	2
pubchem	2-[[4,5-dihydroxy-6-(hydroxymethyl)-2-[[3,4,5-trihydroxy-6-[[6-hydroxy-7,9,13-trimethyl-6-[3-methyl-4-[[3,4,5-trihydroxy-6-(hydroxymethyl)-2-oxanyl]oxy]butyl]-5-oxapentacyclo[10.8.0.02,9.04,8.013,18]eicos-18-en-16-yl]oxy]-2-oxanyl]methoxy]-3-oxanyl]oxy]-6-methyloxane-3,4,5-triol	Molecule 119	OCC1OC(OCC2OC(OC3CCC4(C(=CCC5C4CCC4(C5CC5C4C(C)C(O5)(O)CCC(COC4OC(CO)C(C(C4O)O)O)C)C)C3)C)C(C(C2O)O)O)C(C(C1O)O)OC1OC(C)C(C(C1O)O)O	C51H84O23						1065.2	Low	No	Yes	3	4	2	1	5	0.17	0	1	2
pubchem	3-[[(2S,3R,4S,5R,6R)-4,5-dihydroxy-6-(hydroxymethyl)-3-[[(2S,3R,4S,5S,6R)-3,4,5-trihydroxy-6-(hydroxymethyl)-2-oxanyl]oxy]-2-oxanyl]oxy]-5-hydroxy-2-(4-hydroxyphenyl)-7-[[(2S,3R,4S,5S,6R)-3,4,5-trihydroxy-6-(hydroxymethyl)-2-oxanyl]oxy]-1-benzopyran-4-one	Molecule 120	OC[C@H]1O[C@@H](Oc2c(oc3c(c2=O)c(O)cc(c3)O[C@@H]2O[C@H](CO)[C@H]([C@@H]([C@H]2O)O)O)c2ccc(cc2)O)[C@@H]([C@H]([C@H]1O)O)O[C@@H]1O[C@H](CO)[C@H]([C@@H]([C@H]1O)O)O	C33H40O21						772.66	Low	No	Yes	3	4	1	1	5	0.17	0	0	2
pubchem	3-[[(2S,3R,4S,5R,6R)-4,5-dihydroxy-6-(hydroxymethyl)-3-[[(2S,3R,4S,5S,6R)-3,4,5-trihydroxy-6-(hydroxymethyl)-2-oxanyl]oxy]-2-oxanyl]oxy]-2-(3,4-dihydroxyphenyl)-5-hydroxy-7-[[(2S,3R,4S,5S,6R)-3,4,5-trihydroxy-6-(hydroxymethyl)-2-oxanyl]oxy]-1-benzopyran-4-one	Molecule 121	OC[C@H]1O[C@@H](Oc2c(oc3c(c2=O)c(O)cc(c3)O[C@@H]2O[C@H](CO)[C@H]([C@@H]([C@H]2O)O)O)c2ccc(c(c2)O)O)[C@@H]([C@H]([C@H]1O)O)O[C@@H]1O[C@H](CO)[C@H]([C@@H]([C@H]1O)O)O	C33H40O22						788.66	Low	No	Yes	3	4	1	1	5	0.17	1	1	2
pubchem	5-ethyl-2-oxolanone	Molecule 122	CCC1CCC(=O)O1	C6H10O2						114.14	High	Yes	No	0	3	0	0	1	0.55	0	0	1
pubchem	1-hexadecene	Molecule 123	CCCCCCCCCCCCCCC=C	C16H32						224.43	Low	No	No	1	1	1	1	2	0.55	0	1	3
pubchem	pentadecane	Molecule 124	CCCCCCCCCCCCCCC	C15H32						212.41	Low	No	No	1	1	1	1	2	0.55	0	0	3
pubchem	tetradecane	Molecule 125	CCCCCCCCCCCCCC	C14H30						198.39	Low	No	No	1	1	1	0	3	0.55	0	0	3
pubchem	tridecane	Molecule 126	CCCCCCCCCCCCC	C13H28						184.36	Low	No	No	1	0	0	0	3	0.55	0	0	3
pubchem	(3S,8S,9S,10R,13R,14S,17R)-17-[(2R)-5,6-dimethylheptan-2-yl]-10,13-dimethyl-2,3,4,7,8,9,11,12,14,15,16,17-dodecahydro-1H-cyclopenta[a]phenanthren-3-ol	Molecule 127	O[C@H]1CC[C@]2(C(=CC[C@@H]3[C@@H]2CC[C@]2([C@H]3CC[C@@H]2[C@@H](CCC(C(C)C)C)C)C)C1)C	C28H48O						400.68	Low	No	No	1	2	0	1	2	0.55	0	1	2
pubchem	(9R,10S,13R,14R,17R)-17-[(2R,5R)-5-ethyl-6-methylheptan-2-yl]-10,13-dimethyl-2,3,4,5,6,9,11,12,14,15,16,17-dodecahydro-1H-cyclopenta[a]phenanthren-3-ol	Molecule 128	CC[C@@H](C(C)C)CC[C@H]([C@H]1CC[C@@H]2[C@]1(C)CC[C@H]1C2=CCC2[C@]1(C)CCC(C2)O)C	C29H50O						414.71	Low	No	No	1	3	0	1	2	0.55	0	1	2
pubchem	(1S,4aS,8aR)-7-methyl-4-methylene-1-propan-2-yl-2,3,4a,5,6,8a-hexahydro-1H-naphthalene	Molecule 129	CC1=C[C@@H]2[C@H](CC1)C(=C)CC[C@H]2C(C)C	C15H24						204.35	Low	No	No	1	0	0	0	1	0.55	0	1	2
pubchem	lilagenin	Molecule 130	C[C@H]1CC[C@@]2(OC1)O[C@@H]1[C@H]([C@@H]2C)[C@@]2([C@@H](C1)[C@@H]1CC=C3[C@]([C@H]1CC2)(C)C[C@H]([C@@H](C3)O)O)C	C27H42O4						430.62	High	Yes	Yes	0	1	0	0	0	0.55	0	1	2
pubchem	(3R,4R)-4-ethenyl-4-methyl-3-(1-methylethenyl)-1-propan-2-ylcyclohexene	Molecule 131	C=C[C@@]1(C)CCC(=C[C@@H]1C(=C)C)C(C)C	C15H24						204.35	Low	No	No	1	0	0	0	2	0.55	0	1	2
pubchem	alpha-Muurolene	Molecule 132	CC1=C[C@@H]2[C@H](CC1)C(=CC[C@H]2C(C)C)C	C15H24						204.35	Low	No	No	1	0	0	0	1	0.55	0	1	2
pubchem	Neotigogenin	Molecule 133	C[C@H]1CC[C@@]2(OC1)O[C@@H]1[C@H]([C@@H]2C)[C@@]2([C@@H](C1)[C@@H]1CC[C@@H]3[C@]([C@H]1CC2)(C)CC[C@@H](C3)O)C	C27H44O3						416.64	High	Yes	No	1	2	0	0	1	0.55	0	0	2
pubchem	Trigoforin	Molecule 134	Cc1ccc2c(c1)oc(=O)c(c2C)C	C12H12O2						188.22	High	Yes	No	0	0	0	0	1	0.55	0	1	1
pubchem	acetic acid (1-methylcyclohexyl) ester	Molecule 135	CC(=O)OC1(C)CCCCC1	C9H16O2						156.22	High	Yes	No	0	1	0	0	1	0.55	0	0	1
pubchem	4-methyl-1-benzopyran-2-one	Molecule 136	O=c1cc(C)c2c(o1)cccc2	C10H8O2						160.17	High	Yes	No	0	0	0	0	1	0.55	0	1	1
pubchem	6-[4-[2-(1-piperidinyl)ethoxy]phenyl]-3-pyridin-4-ylpyrazolo[1,5-a]pyrimidine	Molecule 137	C1CCN(CC1)CCOc1ccc(cc1)c1cnc2n(c1)ncc2c1ccncc1	C24H25N5O						399.49	High	Yes	Yes	0	0	0	0	0	0.55	0	0	1
pubchem	N-phenylaniline	Molecule 138	c1ccc(cc1)Nc1ccccc1	C12H11N						169.22	High	Yes	No	0	0	0	0	2	0.55	0	0	1
pubchem	Isoorientin	Molecule 139	OC[C@H]1O[C@H]([C@@H]([C@H]([C@@H]1O)O)O)c1c(O)cc2c(c1O)c(=O)cc(o2)c1ccc(c(c1)O)O	C21H20O11						448.38	Low	No	No	2	1	1	1	3	0.17	1	1	1
pubchem	3-hydroxy-2-phenyl-1-benzopyran-4-one	Molecule 140	O=c1c(O)c(oc2c1cccc2)c1ccccc1	C15H10O3						238.24	High	Yes	No	0	0	0	0	0	0.55	0	0	1
pubchem	(2S,3S,4R)-2-amino-4-hydroxy-3-methylpentanoic acid	Molecule 141	C[C@H]([C@H]([C@@H](C(=O)O)N)C)O	C6H13NO3						147.17	High	No	No	0	3	0	0	2	0.55	0	0	1
pubchem	hexadecane	Molecule 142	CCCCCCCCCCCCCCCC	C16H34						226.44	Low	No	No	1	1	1	1	2	0.55	0	0	3
pubchem	2,3-dihydrobenzofuran	Molecule 143	c1ccc2c(c1)OCC2	C8H8O						120.15	High	Yes	No	0	3	0	0	2	0.55	0	0	1
pubchem	2''-O-p-Coumaroylorientin	Molecule 144	OC[C@H]1O[C@H]([C@@H]([C@H]([C@@H]1O)O)OC(=O)/C=C/c1ccc(cc1)O)c1c(O)cc(c2c1oc(cc2=O)c1ccc(c(c1)O)O)O	C30H26O13						594.52	Low	No	No	3	2	1	1	3	0.17	1	2	1
pubchem	acetic acid [(2R,3R,4S,5R,6S)-3,4-dihydroxy-6-[[5-hydroxy-2-(4-hydroxyphenyl)-4-oxo-7-[[(2S,3R,4S,5S,6R)-3,4,5-trihydroxy-6-(hydroxymethyl)-2-oxanyl]oxy]-1-benzopyran-3-yl]oxy]-5-[[(2S,3R,4S,5S,6R)-3,4,5-trihydroxy-6-(hydroxymethyl)-2-oxanyl]oxy]-2-oxanyl]methyl ester	Molecule 145	OC[C@H]1O[C@@H](O[C@H]2[C@@H](O[C@@H]([C@@H]([C@@H]2O)O)COC(=O)C)Oc2c(oc3c(c2=O)c(O)cc(c3)O[C@@H]2O[C@H](CO)[C@H]([C@@H]([C@H]2O)O)O)c2ccc(cc2)O)[C@@H]([C@H]([C@@H]1O)O)O	C35H42O22						814.69	Low	No	Yes	3	4	2	1	5	0.17	0	0	2
pubchem	3,5-dihydroxy-2-(4-hydroxyphenyl)-7-[[(2S,3R,4S,5S,6R)-3,4,5-trihydroxy-6-(hydroxymethyl)-2-oxanyl]oxy]-1-benzopyran-4-one	Molecule 146	OC[C@H]1O[C@@H](Oc2cc(O)c3c(c2)oc(c(c3=O)O)c2ccc(cc2)O)[C@@H]([C@H]([C@@H]1O)O)O	C21H20O11						448.38	Low	No	Yes	2	0	1	1	3	0.17	0	0	1
IMPPAT	gamma-Eudesmol	Molecule 147	CC1=C2C[C@@H](CC[C@]2(CCC1)C)C(O)(C)C	C15H26O						222.37	High	Yes	No	0	0	0	0	1	0.55	0	1	1
IMPPAT	(+)-delta-Cadinene	Molecule 148	CC1=C[C@@H]2C(=C(C)CC[C@H]2C(C)C)CC1	C15H24						204.35	Low	No	No	1	0	0	0	1	0.55	0	1	2
IMPPAT	(-)-alpha-Cadinol	Molecule 149	CC1=CC2C(CC1)[C@@](C)(O)CC[C@@H]2C(C)C	C15H26O						222.37	High	Yes	No	0	0	0	0	1	0.55	0	1	1
IMPPAT	Levomenol	Molecule 150	CC(=CCC[C@@]([C@H]1CCC(=CC1)C)(O)C)C	C15H26O						222.37	High	Yes	No	0	0	0	0	1	0.55	0	1	2
IMPPAT	1-Isopropyl-4,7-dimethyl-1,3,4,5,6,8a-hexahydro-4a(2H)-naphthalenol	Molecule 151	CC1=CC2C(CC1)(O)C(C)CCC2C(C)C	C15H26O						222.37	High	Yes	No	0	0	0	0	1	0.55	0	1	2
IMPPAT	alpha-Muurolol	Molecule 152	CC1=C[C@@H]2[C@H](CC1)[C@](C)(O)CC[C@@H]2C(C)C	C15H26O						222.37	High	Yes	No	0	0	0	0	1	0.55	0	1	1
IMPPAT	Liguloxide	Molecule 153	CC1CCC2CC3(C1CCC3C)OC2(C)C	C15H26O						222.37	High	Yes	No	0	0	0	0	1	0.55	0	0	2
IMPPAT	Pyridoxine	Molecule 154	OCc1c(CO)cnc(c1O)C	C8H11NO3						169.18	High	No	No	0	0	0	0	1	0.55	0	0	1
IMPPAT	Fenugreekine	Molecule 155	O[C@@H]1[C@H](O)[C@H](O[C@H]1c1cccc(n1)C(=O)N)COP(=O)(OP(=O)(OC[C@H]1O[C@H]([C@@H]([C@@H]1O)O)n1cnc2c1ncnc2N)O)O	C21H27N7O14P2						663.43	Low	No	No	3	4	2	1	5	0.11	0	1	2
IMPPAT	Riboflavin	Molecule 156	OC[C@H]([C@H]([C@H](Cn1c2cc(C)c(cc2nc2c1nc(=O)[nH]c2=O)C)O)O)O	C17H20N4O6						376.36	Low	No	No	0	1	1	1	1	0.55	0	1	1
IMPPAT	Carvacrol	Molecule 157	CC(c1ccc(c(c1)O)C)C	C10H14O						150.22	High	Yes	No	0	1	0	0	2	0.55	0	0	1
IMPPAT	Calcium pantothenate	Molecule 158	OCC([C@H](C(=O)NCCC(=O)[O-])O)(C)C.OCC([C@H](C(=O)NCCC(=O)[O-])O)(C)C.[Ca+2]	C18H32CaN2O10						476.53	Low	No	Yes	2	1	2	1	3	0.17	0	0	2
IMPPAT	Elemicin	Molecule 159	C=CCc1cc(OC)c(c(c1)OC)OC	C12H16O3						208.25	High	Yes	No	0	0	0	0	0	0.55	0	1	1
pubchem	Luteolin	Molecule 60	Oc1cc(O)c2c(c1)oc(cc2=O)c1ccc(c(c1)O)O	C15H10O6	Inactive	Active	Inactive	Active	Inactive	286.24	High	No	No	0	0	0	0	0	0.55	1	1	0
IMPPAT	Graecunin D	Molecule 163	[NH3+]CC(=O)N[C@H](C(=O)N[C@H](C(=O)N1CCC[C@H]1C(=O)N[C@H](C(=O)N[C@H](C(=O)NCC(=O)N[C@H](C(=O)N[C@H](C(=O)NCC(=O)O)Cc1c[nH]c2c1cccc2)[C@H](O)C)[C@H](O)C)CCC(=O)O)CC(=O)O)Cc1ccc(cc1)O	C48H64N11O18+						1083.08	Low	No	Yes	3	4	2	1	6	0.11	0	0	2
IMPPAT	Pentadecanal	Molecule 164	CCCCCCCCCCCCCCC=O	C15H30O						226.4	High	Yes	No	0	0	1	0	2	0.55	0	1	3
IMPPAT	Myristicin	Molecule 165	C=CCc1cc(OC)c2c(c1)OCO2	C11H12O3						192.21	High	Yes	No	0	0	0	0	1	0.55	0	1	1
IMPPAT	Yamogenin	Molecule 166	C[C@H]1CC[C@@]2(OC1)O[C@@H]1[C@H]([C@@H]2C)[C@@]2([C@@H](C1)[C@@H]1CC=C3[C@]([C@H]1CC2)(C)CC[C@@H](C3)O)C	C27H42O3						414.62	High	Yes	No	1	2	0	0	1	0.55	0	1	2
IMPPAT	2-Dodecenal	Molecule 167	CCCCCCCCC/C=C/C=O	C12H22O						182.3	High	Yes	No	0	0	0	0	2	0.55	0	2	3
IMPPAT	Stearic acid	Molecule 168	CCCCCCCCCCCCCCCCCC(=O)O	C18H36O2						284.48	High	No	No	1	1	1	1	2	0.85	0	0	2
IMPPAT	Biotin	Molecule 169	OC(=O)CCCC[C@@H]1SC[C@H]2[C@@H]1NC(=O)N2	C10H16N2O3S						244.31	High	No	Yes	0	0	0	0	0	0.56	0	1	1
IMPPAT	p-Cymene	Molecule 170	Cc1ccc(cc1)C(C)C	C10H14						134.22	Low	Yes	No	1	1	0	0	2	0.55	0	0	2
IMPPAT	Folic	Molecule 171	OC(=O)CC[C@@H](C(=O)O)NC(=O)c1ccc(cc1)NCc1cnc2c(n1)c(=O)nc([nH]2)N	C19H19N7O6						441.4	Low	No	No	2	0	1	1	2	0.11	0	0	2
pubchem	Formononetin	Molecule 61	COc1ccc(cc1)c1coc2c(c1=O)ccc(c2)O	C16H12O4	Inactive	Active	Active	Inactive	Inactive	268.26	High	Yes	No	0	0	0	0	0	0.55	0	0	0
IMPPAT	1-Decanol	Molecule 173	CCCCCCCCCCO	C10H22O						158.28	High	Yes	No	0	1	0	0	2	0.55	0	0	3
IMPPAT	Decanal	Molecule 174	CCCCCCCCCC=O	C10H20O						156.27	High	Yes	No	0	1	0	0	2	0.55	0	1	3
IMPPAT	Docosanoic acid	Molecule 175	CCCCCCCCCCCCCCCCCCCCCC(=O)O	C22H44O2						340.58	Low	No	No	1	1	1	1	2	0.85	0	0	2
IMPPAT	Palmitic acid	Molecule 176	CCCCCCCCCCCCCCCC(=O)O	C16H32O2						256.42	High	Yes	No	1	0	1	0	1	0.85	0	0	2
IMPPAT	Nicotinic acid	Molecule 177	OC(=O)c1cccnc1	C6H5NO2						123.11	High	Yes	No	0	3	0	0	1	0.85	0	0	1
IMPPAT	Inositol	Molecule 178	OC1C(O)C(O)C(C(C1O)O)O	C6H12O6						180.16	Low	No	Yes	1	2	0	0	3	0.55	0	0	1
IMPPAT	Isopiperitenone	Molecule 179	CC1=CC(=O)C(CC1)C(=C)C	C10H14O						150.22	High	Yes	No	0	1	0	0	2	0.55	0	1	1
IMPPAT	Isovitexin	Molecule 180	OC[C@H]1O[C@H]([C@@H]([C@H]([C@@H]1O)O)O)c1c(O)cc2c(c1O)c(=O)cc(o2)c1ccc(cc1)O	C21H20O10						432.38	Low	No	No	1	0	1	1	2	0.55	0	0	1
IMPPAT	Vitamin E	Molecule 181	C[C@@H](CCC[C@]1(C)CCc2c(O1)c(C)c(c(c2C)O)C)CCC[C@@H](CCCC(C)C)C	C29H50O2						430.71	Low	No	Yes	1	3	1	1	1	0.55	0	0	3
IMPPAT	(1R,2R,4S,5R)-6-[(2S,3S,4R,5S,6S)-3,4,5-trihydroxy-6-(hydroxymethyl)oxan-2-yl]oxycyclohexane-1,2,3,4,5-pentol	Molecule 183	OC[C@@H]1O[C@@H](OC2[C@H](O)[C@H](O)C([C@@H]([C@H]2O)O)O)[C@H]([C@@H]([C@@H]1O)O)O	C12H22O11						342.3	Low	No	Yes	2	1	1	1	4	0.17	0	0	0
IMPPAT	Arachidic acid	Molecule 184	CCCCCCCCCCCCCCCCCCCC(=O)O	C20H40O2						312.53	Low	No	No	1	1	1	1	2	0.85	0	0	2
IMPPAT	beta-Tocopherol	Molecule 185	C[C@H](CCC[C@@H](CCCC(C)C)C)CCC[C@]1(C)CCc2c(O1)c(C)cc(c2C)O	C28H48O2						416.68	Low	No	Yes	1	3	1	1	1	0.55	0	0	3
IMPPAT	Apiole	Molecule 186	C=CCc1cc(OC)c2c(c1OC)OCO2	C12H14O4						222.24	High	Yes	No	0	0	0	0	0	0.55	0	1	1
IMPPAT	alpha-Carotene	Molecule 187	CC(=CC=CC=C(C=CC=C(C=CC1=C(C)CCCC1(C)C)C)C)/C=C/C=C(/C=C/[C@H]1C(=CCCC1(C)C)C)\C	C40H56						536.87	Low	No	Yes	2	4	0	1	2	0.17	0	2	3
IMPPAT	Neogitogenin	Molecule 188	C[C@H]1CC[C@@]2(OC1)O[C@@H]1[C@H]([C@@H]2C)[C@@]2([C@@H](C1)[C@@H]1CC[C@@H]3[C@]([C@H]1CC2)(C)C[C@H]([C@@H](C3)O)O)C	C27H44O4						432.64	High	Yes	Yes	1	1	0	0	1	0.55	0	0	2
IMPPAT	beta-Carotene	Molecule 189	CC(=CC=CC=C(/C=C/C=C(/C=C/C1=C(C)CCCC1(C)C)\C)C)C=CC=C(C=CC1=C(C)CCCC1(C)C)C	C40H56						536.87	Low	No	Yes	2	4	0	1	2	0.17	0	1	3
IMPPAT	Vicenin 1	Molecule 190	OCC1O[C@H](C([C@@H]([C@@H]1O)O)O)c1c(O)c([C@@H]2OC[C@H]([C@@H](C2O)O)O)c(c2c1oc(cc2=O)c1ccc(cc1)O)O	C26H28O14						564.49	Low	No	No	3	3	1	1	4	0.17	0	0	1
IMPPAT	(+)-beta-Phellandrene	Molecule 191	CC([C@@H]1CCC(=C)C=C1)C	C10H16						136.23	Low	Yes	No	0	1	0	0	2	0.55	0	0	1
IMPPAT	(-)-cis-Carveol	Molecule 192	CC(=C)[C@@H]1CC=C([C@@H](C1)O)C	C10H16O						152.23	High	Yes	No	0	1	0	0	2	0.55	0	1	1
IMPPAT	(-)-trans-Carveol	Molecule 193	CC(=C)[C@@H]1CC=C([C@H](C1)O)C	C10H16O						152.23	High	Yes	No	0	1	0	0	2	0.55	0	1	1
IMPPAT	alpha-Pinene	Molecule 194	CC1=CCC2CC1C2(C)C	C10H16						136.23	Low	Yes	No	1	1	0	0	2	0.55	0	1	2
IMPPAT	Carvone	Molecule 195	CC(=C)C1CC=C(C(=O)C1)C	C10H14O						150.22	High	Yes	No	0	1	0	0	2	0.55	0	1	1
IMPPAT	Vicenin-2	Molecule 196	OC[C@H]1O[C@H]([C@@H]([C@H]([C@@H]1O)O)O)c1c(O)c([C@@H]2O[C@H](CO)[C@H]([C@@H]([C@H]2O)O)O)c(c2c1oc(cc2=O)c1ccc(cc1)O)O	C27H30O15						594.52	Low	No	Yes	3	4	1	1	4	0.17	0	0	1
IMPPAT	Phytol	Molecule 197	OC/C=C(/CCC[C@@H](CCC[C@@H](CCCC(C)C)C)C)\C	C20H40O						296.53	Low	No	Yes	1	1	1	1	2	0.55	0	1	2
IMPPAT	Vitexin	Molecule 198	OC[C@H]1O[C@H]([C@@H]([C@H]([C@@H]1O)O)O)c1c(O)cc(c2c1oc(cc2=O)c1ccc(cc1)O)O	C21H20O10						432.38	Low	No	No	1	0	1	1	2	0.55	0	0	1
IMPPAT	Trigofoenoside A	Molecule 199	OC[C@H]1O[C@@H](O[C@H]2CC[C@]3(C(=CCC4C3CC[C@]3(C4CC4C3C(C)C(O4)(O)CC[C@H](CO[C@@H]3O[C@H](CO)[C@H]([C@@H]([C@H]3O)O)O)C)C)C2)C)[C@@H]([C@H]([C@@H]1O)O)O[C@@H]1O[C@@H](C)[C@@H]([C@H]([C@H]1O)O)O	C45H74O18						903.06	Low	No	Yes	3	4	2	1	5	0.17	0	1	2
IMPPAT	alpha-Phellandrene	Molecule 200	CC1=CCC(C=C1)C(C)C	C10H16						136.23	Low	Yes	No	0	1	0	0	2	0.55	0	0	1
IMPPAT	Limonene	Molecule 201	CC1=CCC(CC1)C(=C)C	C10H16						136.23	Low	Yes	No	0	1	0	0	2	0.55	0	1	2
IMPPAT	Menthone	Molecule 202	C[C@@H]1CC[C@H](C(=O)C1)C(C)C	C10H18O						154.25	High	Yes	No	0	1	0	0	2	0.55	0	0	1
IMPPAT	(+)-cis-Sabinol	Molecule 203	CC([C@]12C[C@@H]2C(=C)[C@@H](C1)O)C	C10H16O						152.23	High	Yes	No	0	1	0	0	2	0.55	0	1	1
IMPPAT	Galactomannan	Molecule 204	OC[C@H]1O[C@H](OC[C@H]2O[C@@H](O)[C@H]([C@H]([C@@H]2O[C@@H]2O[C@H](CO)[C@H]([C@@H]([C@@H]2O)O)O)O)O)[C@@H]([C@H]([C@H]1O)O)O	C18H32O16						504.44	Low	No	Yes	3	2	1	1	4	0.17	0	0	1
IMPPAT	Pyrrolidine	Molecule 205	C1CCCN1	C4H9N						71.12	Low	No	No	0	3	0	0	3	0.55	0	0	1
IMPPAT	Carpaine	Molecule 206	O=C1CCCCCCC[C@@H]2CC[C@@H]([C@@H](N2)C)OC(=O)CCCCCCC[C@@H]2CC[C@H](O1)[C@H](C)N2	C28H50N2O4						478.71	High	No	Yes	0	2	0	0	1	0.55	0	1	2
IMPPAT	Choline	Molecule 207	OCC[N+](C)(C)C	C5H14NO+						104.17	Low	No	No	0	2	0	0	1	0.55	0	1	1
IMPPAT	Methyl protodioscin	Molecule 208	OCC1OC(OC2CCC3(C(=CCC4C3CCC3(C4CC4C3C(C)C(O4)(OC)CCC(COC3OC(CO)C(C(C3O)O)O)C)C)C2)C)C(C(C1OC1OC(C)C(C(C1O)O)O)O)OC1OC(C)C(C(C1O)O)O	C52H86O22						1063.23	Low	No	Yes	3	4	2	1	5	0.17	0	1	2
IMPPAT	Trigraecum	Molecule 209	COc1cc2c(=O)cc(oc2cc1O)c1ccccc1	C16H12O4						268.26	High	Yes	No	0	0	0	0	0	0.55	0	0	1
IMPPAT	Trigoneoside Xb	Molecule 211	OC[C@H]1O[C@@H](OC2CC3CCC4C(C3(CC2O)C)CCC2(C4CC3C2C(C(O3)(O)CCC(CO[C@@H]2O[C@H](CO)[C@H]([C@@H]([C@H]2O)O)O)C)C)C)[C@@H]([C@H]([C@@H]1O)O)O[C@@H]1O[C@@H](C)[C@@H]([C@H]([C@H]1O)O)O	C45H76O19						921.07	Low	No	Yes	3	4	2	1	5	0.17	0	1	2
IMPPAT	Trigoneoside XIIIa	Molecule 212	OCC1OC(OC2CCC3(C(=CCC4C3CCC3(C4CC4C3C(C)C(O4)(O)CCC(COC3OC(CO)C(C(C3O)O)O)C)C)C2)C)C(C(C1OC1OC(CO)C(C(C1O)OC1OC(CO)C(C(C1O)O)O)O)O)OC1OC(C)C(C(C1O)O)O	C57H94O28						1227.34	Low	No	Yes	3	4	2	1	7	0.17	0	1	2
IMPPAT	4-Hydroxycinnamic acid	Molecule 213	OC(=O)/C=C/c1ccc(cc1)O	C9H8O3						164.16	High	Yes	No	0	0	0	0	1	0.85	0	1	1
IMPPAT	Flavanone	Molecule 214	O=C1CC(Oc2c1cccc2)c1ccccc1	C15H12O2						224.25	High	Yes	No	0	0	0	0	0	0.55	0	0	1
IMPPAT	Glyceryl palmitate	Molecule 215	CCCCCCCCCCCCCCCC(=O)OCC(CO)O	C19H38O4						330.5	High	Yes	Yes	0	0	1	0	2	0.55	0	0	2
IMPPAT	Mimosine	Molecule 216	OC(=O)C(Cn1ccc(=O)c(c1)O)N	C8H10N2O4						198.18	High	No	No	0	1	0	0	2	0.55	0	0	1
IMPPAT	gomisin N	Molecule 217	COc1cc2C[C@@H](C)[C@@H](C)Cc3c(c2c(c1OC)OC)c(OC)c1c(c3)OCO1	C23H28O6						400.46	High	Yes	No	0	0	0	0	1	0.55	0	0	2
pubchem	7-(4-hydroxyphenyl)-[1,3]dioxolo[4,5-g][1]benzopyran-8-one	Molecule 89	Oc1ccc(cc1)c1coc2c(c1=O)cc1c(c2)OCO1	C16H10O5	Inactive	Active	Active	Inactive	Inactive	282.25	High	Yes	No	0	0	0	0	0	0.55	0	0	0
pubchem	5,7-dihydroxy-3-(4-hydroxy-3,5-dimethoxyphenyl)-1-benzopyran-4-one	Molecule 105	COc1cc(cc(c1O)OC)c1coc2c(c1=O)c(O)cc(c2)O	C17H14O7	Inactive	Inactive	Active	Inactive	Inactive	330.29	High	No	No	0	0	0	0	0	0.55	0	0	0
IMPPAT	Falcarindiol	Molecule 220	CCCCCCCC=C[C@@H](C#CC#C[C@@H](C=C)O)O	C17H24O2						260.37	High	Yes	No	0	0	0	0	0	0.55	0	2	2
IMPPAT	3-Amino-4,5-dimethyl-2(5H)-furanone	Molecule 221	CC1OC(=O)C(=C1C)N	C6H9NO2						127.14	High	No	No	0	3	0	0	1	0.55	0	0	1
IMPPAT	2,3-Butanedione	Molecule 222	CC(=O)C(=O)C	C4H6O2						86.09	High	No	No	0	3	0	0	2	0.55	1	1	1
IMPPAT	4-Methylumbelliferyl acetate	Molecule 223	CC(=O)Oc1ccc2c(c1)oc(=O)cc2C	C12H10O4						218.21	High	Yes	No	0	0	0	0	0	0.55	0	2	1
IMPPAT	Liquiritigenin	Molecule 162	Oc1ccc(cc1)[C@@H]1CC(=O)c2c(O1)cc(cc2)O	C15H12O4	Inactive	Active	Inactive	Inactive	Inactive	256.25	High	Yes	Yes	0	0	0	0	0	0.55	0	0	0
IMPPAT	Isopropyl alcohol	Molecule 225	CC(O)C	C3H8O						60.1	High	No	No	0	3	0	0	3	0.55	0	0	1
TCMSP	Trochol	Molecule 226	OCC12CCC(C2C2C(CC1)(C)C1(C)CCC3C(C1CC2)(C)CCC(C3(C)C)O)C(=C)C	C30H50O2						442.72	Low	No	No	1	3	0	1	1	0.55	0	1	2
IMPPAT	Isoliquiritigenin	Molecule 172	Oc1ccc(cc1)/C=C/C(=O)c1ccc(cc1O)O	C15H12O4	Inactive	Inactive	Active	Inactive	Inactive	256.25	High	Yes	No	0	0	0	0	0	0.55	0	1	0
TCMSP	Mairin	Molecule 228	CC(=C)C1CCC2(C1C1CCC3C(C1(C)CC2)(C)CCC1C3(C)CCC(C1(C)C)O)C(=O)O	C30H48O3						456.7	Low	No	No	1	3	0	1	1	0.85	0	1	2
TCMSP	Scopolin	Molecule 229	OCC1OC(Oc2cc3oc(=O)ccc3cc2OC)C(C(C1O)O)O	C16H18O9						354.31	Low	No	No	0	1	0	1	0	0.55	0	1	1
TCMSP	Gentianol	Molecule 230	CC(c1cncc2c1CCOC2=O)O	C10H11NO3						193.2	High	No	No	0	0	0	0	1	0.55	0	0	1
TCMSP	Thiarubrine A	Molecule 231	CC#CC1=CC=C(SS1)C#CC#CC=C	C13H8S2						228.33	High	Yes	No	0	0	0	0	0	0.55	0	2	2
TCMSP	lupeol	Molecule 233	CC(=C)C1CCC2(C1C1CCC3C(C1(C)CC2)(C)CCC1C3(C)CCC(C1(C)C)O)C	C30H50O						426.72	Low	No	No	1	3	0	1	2	0.55	0	1	2
TCMSP	Sitogluside	Molecule 234	CCC(C(C)C)CCC(C1CCC2C1(C)CCC1C2CC=C2C1(C)CCC(C2)OC1OC(CO)C(C(C1O)O)O)C	C35H60O6						576.85	Low	No	No	1	4	0	0	1	0.55	0	1	3
TCMSP	Soyasapogenol B	Molecule 235	OCC1(C)C(O)CCC2(C1CCC1(C2CC=C2C1(C)CCC1(C2CC(CC1O)(C)C)C)C)C	C30H50O3						458.72	High	No	No	1	3	0	1	1	0.55	0	1	2
TCMSP	7alpha,21S,25-Trihydroxy-3beta-acetoxy-21S,23R-epoxy-9(11)-en-dammarane	Molecule 236	CC(=O)O[C@H]1CC[C@]2([C@@H](C1(C)C)CC([C@@]1(C2=CC[C@H]2[C@@]1(C)CC[C@@H]2[C@H]1C[C@@H](O[C@@H]1O)CC(O)(C)C)C)O)C	C32H52O6						532.75	High	No	Yes	1	3	0	0	1	0.55	0	1	2
TCMSP	Soyasaponin I	Molecule 237	OCC1OC(OC2C(OC(C(C2O)O)C(=O)O)OC2CCC3(C(C2(C)CO)CCC2(C3CC=C3C2(C)CCC2(C3CC(C)(C)CC2O)C)C)C)C(C(C1O)O)OC1OC(C)C(C(C1O)O)O	C48H78O18						943.12	Low	No	Yes	3	3	1	1	5	0.11	0	2	2
TCMSP	Scopoletol	Molecule 238	COc1cc2ccc(=O)oc2cc1O	C10H8O4						192.17	High	Yes	No	0	0	0	0	1	0.55	0	1	1
IMPPAT	Quercetin	Molecule 218	Oc1cc(O)c2c(c1)oc(c(c2=O)O)c1ccc(c(c1)O)O	C15H10O7	Inactive	Active	Inactive	Active	Inactive	302.24	High	No	No	0	0	0	0	0	0.55	1	1	0
TCMSP	brevifolin	Molecule 240	COc1cc(OC)cc(c1C(=O)C)O	C10H12O4						196.2	High	Yes	No	0	0	0	0	1	0.55	0	0	1
IMPPAT	Apigenin	Molecule 219	Oc1ccc(cc1)c1cc(=O)c2c(o1)cc(cc2O)O	C15H10O5	Inactive	Inactive	Inactive	Inactive	Active	270.24	High	No	No	0	0	0	0	0	0.55	0	0	0
TCMSP	gallic acid-3-O-(6'-O-galloyl)-glucoside	Molecule 242	O[C@@H]1[C@@H](O)[C@@H](COC(=O)c2cc(O)c(c(c2)O)O)O[C@@H]([C@@H]1O)Oc1cc(cc(c1O)O)C(=O)O	C20H20O14						484.36	Low	No	No	2	2	1	1	3	0.11	1	1	1
TCMSP	(25R)-Spirost-5-en-3β-ol acetate	Molecule 243	C[C@@H]1CC[C@@]2(OC1)O[C@@H]1[C@H]([C@H]2C)[C@@]2([C@H](C1)[C@H]1CC=C3[C@]([C@@H]1CC2)(C)CC[C@@H](C3)OC(=O)C)C	C29H44O4						456.66	High	No	No	1	3	0	1	1	0.55	0	1	2
TCMSP	1-PENTANOL,2-METHYL	Molecule 244	CCCC(CO)C	C6H14O						102.17	High	Yes	No	0	2	0	0	2	0.55	0	0	1
TCMSP	Gitonin	Molecule 245	OCC1OC(OC2CC3CCC4C(C3(CC2O)C)CCC2(C4CC3C2C(C2(O3)CCC(CO2)C)C)C)C(C(C1OC1OC(CO)C(C(C1OC1OC(CO)C(C(C1O)O)O)OC1OCC(C(C1O)O)O)O)O)O	C50H82O23						1051.17	Low	No	Yes	3	4	2	1	5	0.17	0	1	2
TCMSP	Hiyodorilactone A	Molecule 246	OCC=C(C(=O)OC1CC(=CCC(C(=CC2C1C(=C)C(=O)O2)C)OC(=O)C)C)CO	C22H28O8						420.45	High	No	No	0	0	0	0	0	0.55	0	3	1
IMPPAT	Naringetol	Molecule 224	Oc1ccc(cc1)[C@@H]1CC(=O)c2c(O1)cc(cc2O)O	C15H12O5	Inactive	Inactive	Inactive	Inactive	Active	272.25	High	No	Yes	0	0	0	0	0	0.55	0	0	0
TCMSP	Schisandrol	Molecule 248	COc1c(O)cc2c(c1OC)c1c(cc(c(c1OC)OC)O)C[C@@H]([C@](C2)(C)O)C	C22H28O7						404.45	High	No	Yes	0	0	0	0	0	0.55	0	0	1
TCMSP	Tigogenone	Molecule 249	CC1CCC2(OC1)OC1C(C2C)C2(C(C1)C1CCC3C(C1CC2)(C)CCC(=O)C3)C	C27H42O3						414.62	High	No	No	1	2	0	1	1	0.55	0	0	2
TCMSP	Tricornine	Molecule 250	COC1C2C3(CCC(C42C(C1(O)C1(O)CC(C2CC4C1C2OC)OC)N(C3)CC)OC)COC(=O)C	C27H43NO8						509.63	High	No	Yes	1	3	0	0	0	0.55	0	0	2
TCMSP	5,7-dihydroxy-2-(4-hydroxyphenyl)-6-methyl-8-((2S,3R,4R,5S,6R)-3,4,5-trihydroxy-6-(hydroxymethyl)tetrahydro-2H-pyran-2-yl)-4H-chromen-4-one	Molecule 251	OC[C@H]1O[C@H]([C@@H]([C@H]([C@@H]1O)O)O)c1c(O)c(C)c(c2c1oc(cc2=O)c1ccc(cc1)O)O	C22H22O10						446.4	Low	No	No	1	0	1	1	2	0.55	0	0	1
TCMSP	Vitexin-7-glucoside	Molecule 252	OCC1OC(C(C(C1O)O)O)c1c(OC2OC(CO)C(C(C2O)O)O)cc(c2c1oc(cc2=O)c1ccc(cc1)O)O	C27H30O15						594.52	Low	No	Yes	3	4	1	1	3	0.17	0	0	1
TCMSP	Vitexin-7-glucoside_qt	Molecule 253	OC[C@@H]1O[C@@H]([C@H]([C@@H]([C@H]1O)O)O)c1c(O)cc(c2c1oc(cc2=O)c1ccc(cc1)O)O	C21H20O10						432.38	Low	No	No	1	0	1	1	2	0.55	0	0	1
TCMSP	Vitisin C	Molecule 254	Oc1ccc(cc1)C1Oc2c(C1c1cc(O)cc3c1C(c1cc(O)cc(c1)O)C(O3)c1ccc(cc1)O)cc(cc2)C=Cc1cc(O)cc2c1C(c1cc(O)cc(c1)O)C(O2)c1ccc(cc1)O	C56H42O12						906.93	Low	No	Yes	3	4	1	2	6	0.17	0	1	3
TCMSP	apigenin-6-xyloside-8-glucoside	Molecule 255	OC[C@H]1O[C@@H](Oc2c(O)c(O[C@@H]3O[C@@H]([C@@H]([C@H]3O)O)CO)c(c3c2oc(cc3=O)c2ccc(cc2)O)O)[C@@H]([C@H]([C@@H]1O)O)O	C26H28O16						596.49	Low	No	Yes	3	3	1	1	3	0.17	0	0	1
TCMSP	gentianine	Molecule 256	C=Cc1cncc2c1CCOC2=O	C10H9NO2						175.18	High	Yes	No	0	0	0	0	1	0.55	0	0	1
TCMSP	9,11-Dimethyl-11-ethyl-10,12-dihydroxy-dodecanoicacid	Molecule 257	CCC(C(C(CCCCCCCC(=O)O)C)O)(CO)C	C16H32O4						288.42	High	Yes	Yes	0	0	1	0	0	0.56	0	0	2
TCMSP	sarsasapogeni	Molecule 258	C[C@H]1CC[C@@]2(OC1)O[C@@H]1[C@H]([C@@H]2C)[C@@]2([C@@H](C1)[C@@H]1CC[C@H]3[C@]([C@H]1CC2)(C)CC[C@H](C3)O)C	C27H44O3						416.64	High	Yes	No	1	2	0	0	1	0.55	0	0	2
TCMSP	sitogenin	Molecule 259	C[C@H]1CC[C@@]2(OC1)O[C@H]1[C@@H]([C@H]2C)[C@@]2([C@@H](C1)[C@H]1CC[C@H]3[C@]([C@@H]1CC2)(C)C[C@H]([C@H](C3)O)O)C	C27H44O4						432.64	High	Yes	Yes	1	1	0	0	1	0.55	0	0	2
TCMSP	Carpesia lactone	Molecule 260	CC1C(=O)OC2C1CCC(C1C2C(=CC1=O)C)C	C15H20O3						248.32	High	Yes	No	0	0	0	0	0	0.55	0	0	1
KNApSAck	L-Histidine	Molecule 261	NC(C(=O)O)Cc1cnc[nH]1	C6H9N3O2						155.15	High	No	No	0	3	0	0	2	0.55	0	0	1
KNApSAck	Methyl protoneodioscin	Molecule 262	OCC1OC(OC2CCC3(C(=CCC4C3CCC3(C4CC4C3C(C)C(O4)(O)CCC(COC3OC(CO)C(C(C3O)O)O)C)C)C2)C)C(C(C1OC1OC(C)C(C(C1O)O)O)O)OC1OC(C)C(C(C1O)O)O	C51H84O22						1049.2	Low	No	Yes	3	4	2	1	5	0.17	0	1	2
KNApSAck	Trigofoenoside C	Molecule 263	OCC1OC(OC2CC3CCC4C(C3(CC2O)C)CCC2(C4CC3C2C(C(O3)(O)CCC(COC2OC(CO)C(C(C2O)O)O)C)C)C)C(C(C1OC1OC(C)C(C(C1O)O)O)O)OC1OC(C)C(C(C1O)O)O	C51H86O23						1067.21	Low	No	Yes	3	4	2	1	5	0.17	0	1	2
KNApSAck	Protoneodioscin	Molecule 265	OCC1OC(O[C@H]2CC[C@]3(C(=CC[C@@H]4[C@@H]3CC[C@]3([C@H]4C[C@H]4[C@@H]3[C@H](C)[C@@](O4)(O)CC[C@@H](COC3OC(CO)C(C(C3O)O)O)C)C)C2)C)C(C(C1OC1OC(C)C(C(C1O)O)O)O)OC1OC(C)C(C(C1O)O)O	C51H84O22						1049.2	Low	No	Yes	3	4	2	1	5	0.17	0	1	2
KNApSAck	Trigoneoside XIb	Molecule 266	OCC1OC(OC2CC3CCC4C(C3(CC2O)C)CCC2(C4CC3C2C(C(O3)(O)CCC(COC2OC(CO)C(C(C2O)O)O)C)C)C)C(C(C1O)O)OC1OCC(C(C1O)O)O	C44H74O19						907.05	Low	No	Yes	3	4	2	1	5	0.17	0	1	2
KNApSAck	Trigoneoside VIII	Molecule 267	OCC1OC(OCC(CCC2=C(C)C3C(O2)CC2C3(C)CCC3C2CCC2C3(C)CC(C(C2)OC2OC(COC3OCC(C(C3O)O)O)C(C(C2O)O)O)O)C)C(C(C1O)O)O	C44H72O18						889.03	Low	No	Yes	3	4	2	1	5	0.17	0	1	2
KNApSAck	Diosgenin 3-O-beta-D-glucopyranoside	Molecule 269	OC[C@H]1O[C@@H](O[C@H]2CC[C@]3(C(=CC[C@@H]4[C@@H]3CC[C@]3([C@H]4C[C@H]4[C@@H]3[C@H](C)[C@]3(O4)CC[C@H](CO3)C)C)C2)C)[C@@H]([C@H]([C@@H]1O)O)O	C33H52O8						576.76	High	No	Yes	1	3	0	0	0	0.55	0	1	2
KNApSAck	Vitexin-2-O-p-coumarate	Molecule 271	OC[C@H]1O[C@H]([C@@H]([C@H]([C@@H]1O)O)OC(=O)/C=C/c1ccc(cc1)O)c1c(O)cc(c2c1oc(cc2=O)c1ccc(cc1)O)O	C30H26O12						578.52	Low	No	No	3	2	1	1	3	0.17	0	1	1
KNApSAck	delta3,5-Deoxyneotigogenin	Molecule 272	C[C@H]1CC[C@@]2(OC1)O[C@@H]1[C@H]([C@@H]2C)[C@@]2([C@@H](C1)[C@@H]1CC=C3[C@]([C@H]1CC2)(C)CCC=C3)C	C27H40O2						396.61	Low	No	No	1	1	0	1	1	0.55	0	0	2
KNApSAck	Kaempferol 3,7-O-beta-D-diglucopyranoside	Molecule 273	OC[C@H]1O[C@@H](Oc2cc(O)c3c(c2)oc(c(c3=O)O[C@@H]2O[C@H](CO)[C@H]([C@H]([C@H]2O)O)O)c2ccc(cc2)O)[C@@H]([C@H]([C@@H]1O)O)O	C27H30O16						610.52	Low	No	Yes	3	4	1	1	4	0.17	0	0	1
KNApSAck	6,8-Di-C-galactopyranosylapigenin	Molecule 274	OC[C@@H]1O[C@H]([C@@H]([C@H]([C@H]1O)O)O)c1c(O)c([C@@H]2O[C@@H](CO)[C@@H]([C@@H]([C@H]2O)O)O)c(c2c1oc(cc2=O)c1ccc(cc1)O)O	C27H30O15						594.52	Low	No	No	3	4	1	1	4	0.17	0	0	1
KNApSAck	Vicenin II	Molecule 275	OC[C@@H]1O[C@H]([C@H]([C@H]([C@@H]1O)O)O)c1c(O)c([C@@H]2O[C@@H](CO)[C@H]([C@@H]([C@H]2O)O)O)c(c2c1oc(cc2=O)c1ccc(cc1)O)O	C27H30O15						594.52	Low	No	No	3	4	1	1	4	0.17	0	0	1
KNApSAck	8-Galactopyranosyl-6-quinovopyranosylapigenin	Molecule 276	OC[C@H]1O[C@H]([C@@H]([C@H]([C@H]1O)O)O)c1c(O)c([C@@H]2O[C@H](C)[C@H]([C@@H]([C@H]2O)O)O)c(c2c1oc(cc2=O)c1ccc(cc1)O)O	C27H30O14						578.52	Low	No	Yes	3	4	1	1	3	0.17	0	0	1
KNApSAck	Amurensin	Molecule 277	OC[C@@H]1O[C@@H](Oc2cc(O)c3c(c2CCC(O)(C)C)oc(c(c3=O)O)c2ccc(cc2)O)[C@@H]([C@H]([C@@H]1O)O)O	C26H30O12						534.51	Low	No	Yes	3	2	1	1	3	0.17	0	0	1
KNApSAck	Vicenin 3	Molecule 278	OC[C@H]1O[C@H]([C@@H]([C@H]([C@@H]1O)O)O)c1c(O)c([C@H]2OC[C@H]([C@H]([C@H]2O)O)O)c2c(c1O)c(=O)cc(o2)c1ccc(cc1)O	C26H28O14						564.49	Low	No	Yes	3	3	1	1	4	0.17	0	0	1
KNApSAck	Schisandrol A	Molecule 279	COc1c(OC)cc2c(c1OC)c1c(cc(c(c1OC)OC)OC)C[C@@H]([C@@](C2)(C)O)C	C24H32O7						432.51	High	Yes	No	0	0	0	0	0	0.55	0	0	2
KNApSAck	Rhaponticin	Molecule 280	OC[C@@H]1O[C@@H](Oc2cc(/C=C/c3ccc(c(c3)O)OC)cc(c2)O)[C@H]([C@H]([C@@H]1O)O)O	C21H24O9						420.41	Low	No	Yes	1	0	1	1	1	0.55	0	1	1
KNApSAck	Orientin	Molecule 281	OC[C@@H]1O[C@H]([C@@H]([C@H]([C@@H]1O)O)O)c1c(O)cc(c2c1oc(cc2=O)c1ccc(c(c1)O)O)O	C21H20O11						448.38	Low	No	No	2	1	1	1	3	0.17	1	1	1
KNApSAck	Cosmosiin	Molecule 282	OC[C@H]1O[C@@H](Oc2cc(O)c3c(c2)oc(cc3=O)c2ccc(cc2)O)[C@@H]([C@H]([C@@H]1O)O)O	C21H20O10						432.38	Low	No	Yes	1	0	1	1	2	0.55	0	0	1
TCMSP	Nortangeretin	Molecule 239	Oc1ccc(cc1)c1cc(=O)c2c(o1)c(O)c(c(c2O)O)O	C15H10O7	Inactive	Active	Inactive	Active	Inactive	302.24	High	No	No	0	0	0	0	0	0.55	1	2	0
KNApSAck	Melatonin	Molecule 284	COc1ccc2c(c1)c(CCNC(=O)C)c[nH]2	C13H16N2O2						232.28	High	Yes	No	0	0	0	0	0	0.55	0	0	1
KNApSAck	4-O-beta-D-Mannopyranosyl-D-mannose	Molecule 285	OC[C@H]([C@H]([C@@H]([C@@H](C=O)O)O)O[C@@H]1O[C@H](CO)[C@H]([C@@H]([C@@H]1O)O)O)O	C12H22O11						342.3	Low	No	Yes	2	1	1	1	4	0.17	0	1	1
KNApSAck	Isorhamnetin	Molecule 283	COc1ccc(cc1O)c1oc2cc(O)cc(c2c(=O)c1O)O	C16H12O7	Inactive	Inactive	Active	Inactive	Inactive	316.26	High	No	No	0	0	0	0	0	0.55	0	0	0

## Sheet: S2
Molecule	Uniprot ID	Common name
7,4'-Dihydroxyflavone	P11511	CYP19A1
7,4'-Dihydroxyflavone	Q9H2K2	TNKS2
7,4'-Dihydroxyflavone	O95271	TNKS
7,4'-Dihydroxyflavone	O43570	CA12
7,4'-Dihydroxyflavone	P03372	ESR1
7,4'-Dihydroxyflavone	Q92731	ESR2
7,4'-Dihydroxyflavone	P09874	PARP1
Daidzein	P05091	ALDH2
Daidzein	P43166	CA7
Daidzein	P22748	CA4
Daidzein	P24557	TBXAS1
Daidzein	P21397	MAOA
Daidzein	P00533	EGFR
Daidzein	O43451	MGAM
Daidzein	P28223	HTR2A
Daidzein	P28335	HTR2C
Daidzein	P30542	ADORA1
Daidzein	P29274	ADORA2A
Daidzein	P14061	HSD17B1
Daidzein	P11474	ESRRA
Daidzein	O95718	ESRRB
Daidzein	Q9UNQ0	ABCG2
Kaempferol	Q9NPH5	NOX4
Kaempferol	P15121	AKR1B1
Kaempferol	P47989	XDH
Kaempferol	P14679	TYR
Kaempferol	P36888	FLT3
Kaempferol	P00918	CA2
Kaempferol	P09917	ALOX5
Kaempferol	P37059	HSD17B2
Kaempferol	P33527	ABCC1
Kaempferol	P35869	AHR
Kaempferol	P08183	ABCB1
Kaempferol	Q16678	CYP1B1
Kaempferol	P22303	ACHE
Kaempferol	Q04760	GLO1
Kaempferol	P43405	SYK
Kaempferol	P49841	GSK3B
Kaempferol	P14780	MMP9
Kaempferol	P08253	MMP2
Kaempferol	P16050	ALOX15
Kaempferol	P18054	ALOX12
Kaempferol	Q13332	PTPRS
Kaempferol	Q15078	CDK5R1
Kaempferol	Q00535	CDK5
Kaempferol	Q8WWL7	CCNB3
Kaempferol	P06493	CDK1
Kaempferol	P14635	CCNB1
Kaempferol	O95067	CCNB2
Kaempferol	P05089	ARG1
Kaempferol	Q9HC97	GPR35
Kaempferol	P53355	DAPK1
Kaempferol	P29372	MPG
Kaempferol	Q96S37	SLC22A12
olmelin	P16152	CBR1
3',5,7-trihydroxy-5'-methoxyisoflavone	Q16539	MAPK14
3',5,7-trihydroxy-5'-methoxyisoflavone	P11309	PIM1
3',5,7-trihydroxy-5'-methoxyisoflavone	P35968	KDR
3',5,7-trihydroxy-5'-methoxyisoflavone	P53779	MAPK10
3',5,7-trihydroxy-5'-methoxyisoflavone	P24941	CDK2
3',5,7-trihydroxy-5'-methoxyisoflavone	P06401	PGR
3',5,7-trihydroxy-5'-methoxyisoflavone	P19793	RXRA
3',5,7-trihydroxy-5'-methoxyisoflavone	P15559	NQO1
3',5,7-trihydroxy-5'-methoxyisoflavone	P14174	MIF
3',5,7-trihydroxy-5'-methoxyisoflavone	Q08499	PDE4D
3',5,7-trihydroxy-5'-methoxyisoflavone	P00439	PAH
3',5,7-trihydroxy-5'-methoxyisoflavone	P78368	CSNK1G2
3',5,7-trihydroxy-5'-methoxyisoflavone	P03950	ANG
3',5,7-trihydroxy-5'-methoxyisoflavone	P07900	HSP90AA1
3',5,7-trihydroxy-5'-methoxyisoflavone	Q06520	SULT2A1
3',5,7-trihydroxy-5'-methoxyisoflavone	Q02127	DHODH
3',5,7-trihydroxy-5'-methoxyisoflavone	P35558	PCK1
3',5,7-trihydroxy-5'-methoxyisoflavone	P08235	NR3C2
3',5,7-trihydroxy-5'-methoxyisoflavone	P08709	F7
3',5,7-trihydroxy-5'-methoxyisoflavone	P54577	YARS1
3',5,7-trihydroxy-5'-methoxyisoflavone	P04062	GBA
3',5,7-trihydroxy-5'-methoxyisoflavone	P12931	SRC
3',5,7-trihydroxy-5'-methoxyisoflavone	O76074	PDE5A
3',5,7-trihydroxy-5'-methoxyisoflavone	P34896	SHMT1
3',5,7-trihydroxy-5'-methoxyisoflavone	P11712	CYP2C9
3',5,7-trihydroxy-5'-methoxyisoflavone	Q96RI1	NR1H4
3',5,7-trihydroxy-5'-methoxyisoflavone	O75469	NR1I2
3',5,7-trihydroxy-5'-methoxyisoflavone	P18031	PTPN1
3',5,7-trihydroxy-5'-methoxyisoflavone	P00742	F10
3',5,7-trihydroxy-5'-methoxyisoflavone	P62942	FKBP1A
3',5,7-trihydroxy-5'-methoxyisoflavone	Q9BZX2	UCK2
3',5,7-trihydroxy-5'-methoxyisoflavone	P06744	GPI
3',5,7-trihydroxy-5'-methoxyisoflavone	P06730	EIF4E
3',5,7-trihydroxy-5'-methoxyisoflavone	P01112	HRAS
3',5,7-trihydroxy-5'-methoxyisoflavone	P23919	DTYMK
3',5,7-trihydroxy-5'-methoxyisoflavone	P28161	GSTM2
3',5,7-trihydroxy-5'-methoxyisoflavone	Q92831	KAT2B
3',5,7-trihydroxy-5'-methoxyisoflavone	Q8IV48	ERI1
3',5,7-trihydroxy-5'-methoxyisoflavone	P22102	GART
3',5,7-trihydroxy-5'-methoxyisoflavone	Q16836	HADH
3',5,7-trihydroxy-5'-methoxyisoflavone	Q16222	UAP1
7,4'-Dihydroxyflavone	P03372	ESR1
7,4'-Dihydroxyflavone	P00390	GSR
7,4'-Dihydroxyflavone	Q92731	ESR2
7,4'-Dihydroxyflavone	P10275	AR
7,4'-Dihydroxyflavone	Q00534	CDK6
7,4'-Dihydroxyflavone	P15559	NQO1
7,4'-Dihydroxyflavone	P03950	ANG
7,4'-Dihydroxyflavone	P12931	SRC
7,4'-Dihydroxyflavone	P04179	SOD2
7,4'-Dihydroxyflavone	P27707	DCK
7,4'-Dihydroxyflavone	P05091	ALDH2
7,4'-Dihydroxyflavone	P52732	KIF11
7,4'-Dihydroxyflavone	P04278	SHBG
7,4'-Dihydroxyflavone	P78536	ADAM17
7,4'-Dihydroxyflavone	O60563	CCNT1
7,4'-Dihydroxyflavone	Q15303	ERBB4
7,4'-Dihydroxyflavone	P00742	F10
7,4'-Dihydroxyflavone	P16442	ABO
7,4'-Dihydroxyflavone	P06213	INSR
7,4'-Dihydroxyflavone	P07686	HEXB
7,4'-Dihydroxyflavone	P08246	ELANE
7,4'-Dihydroxyflavone	P98170	XIAP
7,4'-Dihydroxyflavone	P00517	PRKACA
7,4'-Dihydroxyflavone	P42574	CASP3
7,4'-Dihydroxyflavone	P00797	REN
Daidzein	P45452	MMP13
Daidzein	P00734	F2
Daidzein	P22894	MMP8
Daidzein	P49354	FNTA
Daidzein	P62508	ESRRG
Daidzein	P45983	MAPK8
Daidzein	P35557	GCK
Daidzein	P06744	GPI
Daidzein	Q92947	GCDH
Kaempferol	P00734	F2
Kaempferol	P08631	HCK
Kaempferol	P06276	BCHE
Kaempferol	P00751	CFB
Kaempferol	P11142	HSPA8
Kaempferol	Q62986	Esr2
Kaempferol	O15530	PDPK1
Kaempferol	P06737	PYGL
Kaempferol	P00736	C1R
Kaempferol	Q9UKM7	MAN1B1
Kaempferol	P05451	REG1A
Kaempferol	Q02127	DHODH
Kaempferol	P04818	TYMS
Kaempferol	P11766	ADH5
Kaempferol	P06239	LCK
Kaempferol	P32589	SSE1
Kaempferol	P42330	AKR1C3
Kaempferol	O60674	JAK2
Kaempferol	P0DUB6	AMY1A
Kaempferol	P00519	ABL1
Kaempferol	P11310	ACADM
Kaempferol	Q96CA5	BIRC7
Kaempferol	P24752	ACAT1
Kaempferol	P61587	RND3
Kaempferol	Q9P2T1	GMPR2
Kaempferol	P36959	GMPR
Kaempferol	Q00688	FKBP3
tricin	P18075	BMP7
tricin	Q00796	SORD
tricin	P34913	EPHX2
tricin	Q04828	AKR1C1
tricin	P27487	DPP4
tricin	P15289	ARSA
tricin	P15309	ACP3
tricin	Q9P2W7	B3GAT1
tricin	Q9HAN9	NMNAT1
tricin	P49759	CLK1
tricin	P43235	CTSK
tricin	P08473	MME
tricin	Q9Y689	ARL5A
tricin	P29466	CASP1
tricin	Q9NNX6	CD209
tricin	P36959	GMPR
tricin	O43708	GSTZ1
tricin	Q00688	FKBP3
olmelin	P00918	CA2
olmelin	P06276	BCHE
olmelin	P11362	FGFR1
olmelin	P56817	BACE1
olmelin	P02766	TTR
olmelin	P35221	CTNNA1
olmelin	P08254	MMP3
olmelin	P15090	FABP4
olmelin	P49789	FHIT
olmelin	P50613	CDK7
olmelin	P20231	TPSB2
5,7,3'-Trihydroxy-5'-methylisoflavone	P28482	MAPK1
5,7,3'-Trihydroxy-5'-methylisoflavone	P08758	ANXA5
5,7,3'-Trihydroxy-5'-methylisoflavone	P14174	MIF
5,7,3'-Trihydroxy-5'-methylisoflavone	P22894	MMP8
5,7,3'-Trihydroxy-5'-methylisoflavone	Q06124	PTPN11
5,7,3'-Trihydroxy-5'-methylisoflavone	P07900	HSP90AA1
5,7,3'-Trihydroxy-5'-methylisoflavone	O76054	SEC14L2
5,7,3'-Trihydroxy-5'-methylisoflavone	P42768	WAS
5,7,3'-Trihydroxy-5'-methylisoflavone	P52333	JAK3
5,7,3'-Trihydroxy-5'-methylisoflavone	P05981	HPN
5,7,3'-Trihydroxy-5'-methylisoflavone	P27707	DCK
5,7,3'-Trihydroxy-5'-methylisoflavone	O43617	TRAPPC3
5,7,3'-Trihydroxy-5'-methylisoflavone	P43403	ZAP70
5,7,3'-Trihydroxy-5'-methylisoflavone	P02753	RBP4
5,7,3'-Trihydroxy-5'-methylisoflavone	P49137	MAPKAPK2
5,7,3'-Trihydroxy-5'-methylisoflavone	P10276	RARA
Thiamine	P09960	LTA4H
Thiamine	P29474	NOS3
Thiamine	P35398	RORA
Thiamine	P27338	MAOB
Thiamine	O15496	PLA2G10
Thiamine	P49763	PGF
Thiamine	P10828	THRB
Thiamine	P08581	MET
Thiamine	P08263	GSTA1
Thiamine	P55055	NR1H2
Thiamine	P31751	AKT2
Thiamine	P37231	PPARG
Thiamine	P11473	VDR
Thiamine	P29317	EPHA2
Thiamine	P04150	NR3C1
Thiamine	P04035	HMGCR
Thiamine	P60568	IL2
Thiamine	P13631	RARG
Thiamine	Q02750	MAP2K1
Thiamine	P08238	HSP90AB1
Thiamine	Q13231	CHIT1
Thiamine	P11086	PNMT

## Sheet: S3
The molecular docking grid parameters
Targets	PDB ID
EGFR	6S9C	center_x =	-24.618
		center_y =	-58.533
		center_z =	-7.704
		size_x =	83
		size_y =	60
		size_z =	81
HRAS	7DPJ	center_x =	-2.221
		center_y =	-21.046
		center_z =	-28.214
		size_x =	54
		size_y =	58
		size_z =	51
MAPK1	4ZZN	center_x =	-3.283
		center_y =	8.211
		center_z =	47.315
		size_x =	76
		size_y =	59
		size_z =	82
SRC	2SRC	center_x =	20.587
		center_y =	33.76
		center_z =	67.439
		size_x =	78
		size_y =	83
		size_z =	76

## Sheet: S4
	Protein	PDB Id
	HRAS	7DPJ
	EGFR	6S9C
	SRC	2SRC
	MAPK1	4ZZN
HRAS	7DPJ	Name of the ligand	Binding Free Energy (kcal/mol)	pKi	Ligand Efficiency (kcal/mol/non-H atom)	Torsional Energy
		7,4'-Dihydroxyflavone	-8.7	6.38	0.4579	0.9339
		Kaempferol	-8.5	6.23	0.4048	1.5565
		tricin	-8.4	6.16	0.35	1.8678
		5,7,3'-Trihydroxy-5'-methylisoflavone	-7.7	5.65	0.3667	1.2452
		3',5,7-trihydroxy-5'-methoxyisoflavone	-7.7	5.65	0.35	1.5565
		Daidzein	-7.6	5.57	0.4	0.9339
		olmelin	-7.6	5.57	0.3619	1.2452
		Thiamine	-6.5	4.77	0.3611	1.5565
	6S9C	Name of the ligand	Binding Free Energy (kcal/mol)	pKi	Ligand Efficiency (kcal/mol/non-H atom)	Torsional Energy
		5,7,3'-Trihydroxy-5'-methylisoflavone	-8.9	6.53	0.4238	1.2452
		7,4'-Dihydroxyflavone	-8.5	6.23	0.4474	0.9339
		3',5,7-trihydroxy-5'-methoxyisoflavone	-8.5	6.23	0.3864	1.5565
		olmelin	-8.3	6.09	0.3952	1.2452
		Kaempferol	-8.3	6.09	0.3952	1.5565
		Daidzein	-8.1	5.94	0.4263	0.9339
		tricin	-8.1	5.94	0.3375	1.8678
		Thiamine	-6.1	4.47	0.3389	1.5565
	2SRC	Name of the ligand	Binding Free Energy (kcal/mol)	pKi	Ligand Efficiency (kcal/mol/non-H atom)	Torsional Energy
		3',5,7-trihydroxy-5'-methoxyisoflavone	-9.3	6.82	0.4429	1.2452
		olmelin	-9.3	6.82	0.4227	1.5565
		5,7,3'-Trihydroxy-5'-methylisoflavone	-9.2	6.75	0.4381	1.2452
		Kaempferol	-9	6.6	0.4286	1.5565
		Daidzein	-8.7	6.38	0.4579	0.9339
		7,4'-Dihydroxyflavone	-8.6	6.31	0.4526	0.9339
		tricin	-8.5	6.23	0.3542	1.8678
		Thiamine	-6.7	4.91	0.3722	1.5565
	4ZZN	Name of the ligand	Binding Free Energy (kcal/mol)	pKi	Ligand Efficiency (kcal/mol/non-H atom)	Torsional Energy
		5,7,3'-Trihydroxy-5'-methylisoflavone	-7.9	5.79	0.3762	1.2452
		tricin	-7.9	5.79	0.3292	1.8678
		3',5,7-trihydroxy-5'-methoxyisoflavone	-7.8	5.72	0.3545	1.5565
		7,4'-Dihydroxyflavone	-7.7	5.65	0.4053	0.9339
		olmelin	-7.6	5.57	0.3619	1.2452
		Kaempferol	-7.5	5.5	0.3571	1.5565
		Daidzein	-7.4	5.43	0.3895	0.9339
		Thiamine	-6.5	4.77	0.3611	1.5565
